# Supplementary material for: Survey of Lichenized Fungi DNA Barcodes on King George Island (Antarctica): An Aid to Species Discovery
Source: MDPI journal article supplement (doi:10.3390/jof9050552), 2023-05-11
Supplement: s1 [file s1]

| Sample group | Sample code | LCA   | Determination        | Top hits                                                                                                                                                                                                                                                                                                                                                                                                                                                  | Accession                                                                                                                                                                                                                                                                                                                                                                                                                                                                                                                          | Coverage range                                                                                                                                                              | Identity range                                                                                                                                                                                                                                                   |
|--------------|-------------|-------|----------------------|-----------------------------------------------------------------------------------------------------------------------------------------------------------------------------------------------------------------------------------------------------------------------------------------------------------------------------------------------------------------------------------------------------------------------------------------------------------|------------------------------------------------------------------------------------------------------------------------------------------------------------------------------------------------------------------------------------------------------------------------------------------------------------------------------------------------------------------------------------------------------------------------------------------------------------------------------------------------------------------------------------|-----------------------------------------------------------------------------------------------------------------------------------------------------------------------------|------------------------------------------------------------------------------------------------------------------------------------------------------------------------------------------------------------------------------------------------------------------|
| I            | 1A          | Usnea | Usnea aurantiacoatra | Usnea aurantiacoatra (21)<br>Usnea antarctica (8)                                                                                                                                                                                                                                                                                                                                                                                                         | KX147249.1, DQ534488.2, EF179799.1, ...<br>EF179796.1, KJ607898.1, HQ650616.1, ...                                                                                                                                                                                                                                                                                                                                                                                                                                                 | 94% - 100%<br>90% - 100%                                                                                                                                                    | 99.17% - 99.88%<br>98.72% - 99.87%                                                                                                                                                                                                                               |
| I            | 6A          | Usnea | Usnea aurantiacoatra | Usnea antarctica (22)<br>Usnea aurantiacoatra (40)                                                                                                                                                                                                                                                                                                                                                                                                        | MG200277.1, KJ607898.1, HQ650616.1, ...<br>KX147245.1, DQ534488.2, EF179799.1, ...                                                                                                                                                                                                                                                                                                                                                                                                                                                 | 91% - 100%<br>91% - 100%                                                                                                                                                    | 99.52% - 100%<br>99.52% - 100%                                                                                                                                                                                                                                   |
| I            | 13D         | Usnea | Usnea antarctica     | Usnea antarctica (22)<br>Usnea aurantiacoatra (40)                                                                                                                                                                                                                                                                                                                                                                                                        | MG200279.1, KJ607898.1, HQ650616.1, ...<br>KX147250.1, DQ534488.2, MG200305.1, ...                                                                                                                                                                                                                                                                                                                                                                                                                                                 | 80% - 100%<br>80% - 100%                                                                                                                                                    | 99.27% - 100%<br>99.03% - 100%                                                                                                                                                                                                                                   |
| I            | 14B         | Usnea | Usnea aurantiacoatra | Usnea antarctica (22)<br>Usnea aurantiacoatra (40)                                                                                                                                                                                                                                                                                                                                                                                                        | KJ607898.1, HQ650616.1, EF179795.1 ...<br>KX147249.1, DQ534488.2, EF179798.1, ...                                                                                                                                                                                                                                                                                                                                                                                                                                                  | 80% - 100%<br>80% - 100%                                                                                                                                                    | 99.40% - 99.88%<br>99.25% - 100%                                                                                                                                                                                                                                 |
| I            | 85A         | Usnea | Usnea aurantiacoatra | Usnea antarctica (22)<br>Usnea aurantiacoatra (40)                                                                                                                                                                                                                                                                                                                                                                                                        | KJ607899.1, HQ650616.1, MG200282.1, ...<br>KX147238.1, MG200297.1, DQ534488.2, ...                                                                                                                                                                                                                                                                                                                                                                                                                                                 | 90% - 100%<br>90% - 100%                                                                                                                                                    | 98.70% - 99.86%<br>98.70% - 99.86%                                                                                                                                                                                                                               |
| I            | 3B          | Usnea | Usnea antarctica     | Usnea aurantiacoatra (21)<br>Usnea antarctica (8)                                                                                                                                                                                                                                                                                                                                                                                                         | KX147249.1, DQ534488.2, EF179799.1, ...<br>KJ607898.1, EF179796.1, HQ650616.1, ...                                                                                                                                                                                                                                                                                                                                                                                                                                                 | 97% - 100%<br>90% - 100%                                                                                                                                                    | 99.30% - 100%<br>98.95% - 99.88%                                                                                                                                                                                                                                 |
| I            | 9C          | Usnea | Usnea antarctica     | Usnea aurantiacoatra (21)<br>Usnea antarctica (8)                                                                                                                                                                                                                                                                                                                                                                                                         | KX147250.1, DQ534488.2, EF179797.1, ...<br>HQ650616.1, EF179795.1, KJ607898.1, ...                                                                                                                                                                                                                                                                                                                                                                                                                                                 | 96% - 100%<br>89% - 100%                                                                                                                                                    | 99.08% - 99.88%<br>99.08% - 99.64%                                                                                                                                                                                                                               |
| I            | 22A         | Usnea | Usnea antarctica     | Usnea antarctica (22)<br>Usnea aurantiacoatra (40)                                                                                                                                                                                                                                                                                                                                                                                                        | MG200276.1, KJ607898.1, HQ650616.1, ...<br>KX147250.1, DQ534488.2, EF179798.1, ...                                                                                                                                                                                                                                                                                                                                                                                                                                                 | 90% - 100%<br>90% - 100%                                                                                                                                                    | 99.30% - 100%<br>99.03% - 99.72%                                                                                                                                                                                                                                 |
| I            | 41A         | Usnea | Usnea antarctica     | Usnea aurantiacoatra (40)<br>Usnea antarctica (22)                                                                                                                                                                                                                                                                                                                                                                                                        | KX147245.1, DQ534488.2, EF179798.1, ...<br>MG200277.1, KJ607898.1, HQ650616.1, ...                                                                                                                                                                                                                                                                                                                                                                                                                                                 | 90% - 100%<br>90% - 100%                                                                                                                                                    | 99.15% - 99.86%<br>99.15% - 99.84%                                                                                                                                                                                                                               |
| I            | 71A1        | Usnea | Usnea aurantiacoatra | Usnea aurantiacoatra (21)<br>Usnea antarctica (8)                                                                                                                                                                                                                                                                                                                                                                                                         | KX147245.1, DQ534488.2, EF179798.1, ...<br>KJ607898.1, HQ650616.1, EF179795.1, ...                                                                                                                                                                                                                                                                                                                                                                                                                                                 | 99% - 100%<br>92% - 100%                                                                                                                                                    | 99.05% - 99.76%<br>99.16% - 99.64%                                                                                                                                                                                                                               |
| I            | 4A          | Usnea | Usnea aurantiacoatra | Neuropogon antarcticus (3)<br>Usnea antarctica (16)<br>Usnea aurantiacoatra (101)<br>Usnea acromelana (7)<br>Usnea sp. (5)<br>Usnea trachycarpa (12)<br>Usnea ushuaiensis (1)<br>Usnea subantarctica (8)<br>Usnea sphacelata (10)<br>Usnea aff. Perpusilla (2)<br>Usnea perpusilla (2)<br>Usnea lambii (1)<br>Neuropogon trachycarpus (1)<br>Neuropogon sphacelatus (1)<br>uncultured Usnea (5)<br>Usnea aff. Igniaria (1)<br>Usnea aff. Fragilescens (1) | AJ748100.1, AJ748099.1, AJ748101.1<br>AB103541.1, DQ235517.1, KJ607898.1, ...<br>KX147251.1, DQ534488.2, KR053347.1, ...<br>JQ314768.1, DQ235515.1, JQ314821.1, ...<br>EF492171.1, JX144648.1, MK010860.1, ...<br>JQ314702.1, EF116568.1, DQ235497.1, ...<br>EF492146.1<br>DQ767961.1, EF179806.1, JF283509.1, ...<br>DQ235495.1, EF179802.1, AB103542.1, ...<br>DQ235512.1, DQ235510.1<br>DQ235490.1, DQ235488.1<br>EF179800.1<br>AJ748103.1<br>AJ748102.1<br>KM369309.1, KM369407.1, KM369308.1, ...<br>DQ219307.1<br>MW241068.1 | 100%<br>88% - 100%<br>87% - 100%<br>87% - 95%<br>87% - 100%<br>87% - 94%<br>87%<br>90% - 100%<br>92% - 96%<br>90%<br>90%<br>89%<br>100%<br>100%<br>93% - 94%<br>100%<br>94% | 98.65% - 100%<br>98.26% - 100%<br>96.11% - 100%<br>98.38% - 98.89%<br>95% - 98.23%<br>97.23% - 98.01%<br>97.79%<br>97.05% - 97.50%<br>96.25% - 97.02%<br>96.81% - 97.01%<br>96.80% - 97.01%<br>96.96%<br>96.54%<br>96.53%<br>95.68% - 95.88%<br>95.37%<br>95.31% |
| I            | 24A         | Usnea | Usnea antarctica     | Usnea antarctica (22)<br>Usnea aurantiacoatra (40)                                                                                                                                                                                                                                                                                                                                                                                                        | MG200277.1, KJ607898.1, HQ650616.1, ...<br>KX147245.1, DQ534488.2, EF179798.1, ...                                                                                                                                                                                                                                                                                                                                                                                                                                                 | 95% - 100%<br>95% - 100%                                                                                                                                                    | 99.54% - 100%<br>99.39% - 100%                                                                                                                                                                                                                                   |
| I            | 15A         | Usnea | Usnea antarctica     | Usnea antarctica (22)<br>Usnea aurantiacoatra (40)                                                                                                                                                                                                                                                                                                                                                                                                        | MG200277.1, KJ607898.1, HQ650616.1, ...<br>KX147245.1, MG200305.1, DQ534488.2, ...                                                                                                                                                                                                                                                                                                                                                                                                                                                 | 100%<br>99% - 100%                                                                                                                                                          | 99.52% - 100%<br>99.52% - 100%                                                                                                                                                                                                                                   |
| I            | 35A         | Usnea | Usnea aurantiacoatra | Usnea antarctica (22)<br>Usnea aurantiacoatra (40)                                                                                                                                                                                                                                                                                                                                                                                                        | KJ607898.1, EF179796.1, MG200277.1, ...<br>KX147253.1, DQ534488.2, EF179798.1, ...                                                                                                                                                                                                                                                                                                                                                                                                                                                 | 96% - 100%<br>95% - 100%                                                                                                                                                    | 99.39% - 100%<br>99.39% - 100%                                                                                                                                                                                                                                   |
| I            | 17A         | Usnea | Usnea antarctica     | Usnea antarctica (22)<br>Usnea aurantiacoatra (40)                                                                                                                                                                                                                                                                                                                                                                                                        | KJ607898.1, MG200277.1, EF179796.1, ...<br>MG200296.1, KX147253.1, DQ534488.2, ...                                                                                                                                                                                                                                                                                                                                                                                                                                                 | 100%<br>100%                                                                                                                                                                | 99.36% - 100%<br>99.36% - 100%                                                                                                                                                                                                                                   |
| I            | 36A         | Usnea | Usnea aurantiacoatra | Usnea antarctica (28)<br>Usnea aurantiacoatra (103)<br>Neuropogon antarcticus (3)<br>Usnea acromelana (3)<br>Usnea sp. (4)<br>Usnea ushuaiensis (6)<br>Usnea trachycarpa (6)<br>Usnea perpusilla (6)<br>Usnea lambii (13)<br>Usnea ciliata (1)<br>Usnea aff. Perpusilla (1)<br>Usnea subantarctica (4)<br>Usnea sphacelata (3)                                                                                                                            | MG200281.1, DQ235517.1, AB103541.1, ...<br>KX147245.1, MG200305.1, JF283507.1, ...<br>AJ748100.1, AJ748099.1, AJ748101.1<br>DQ235515.1, DQ235516.1, DQ235514.1<br>EF492171.1, EF492172.1, EF492174.1, ...<br>EF492146.1, EF492168.1, EF492212.1, ...<br>DQ235497.1, DQ235496.1, EF179804.1, ...<br>EF492147.1, EF492161.1, DQ235490.1, ...<br>EF492189.1, EF492152.1, EF492199.1, ...<br>JF283511.1<br>DQ235512.1<br>JF283509.1, EF179806.1, DQ235506.1, ...<br>DQ235495.1, EF179803.1, EF179802.1                                 | 80% - 99%<br>80% - 99%<br>80%<br>81%<br>84%<br>84%<br>81% - 99%<br>81% - 84%<br>84%<br>85%<br>81%<br>81% - 85%<br>81% - 99%                                                 | 98.99% - 100%<br>99% - 99.83%<br>98.56% - 99.79%<br>98.57%<br>97.63% - 98.22%<br>96.64% - 97.83%<br>95.37% - 97.75%<br>96.84% - 97.63%<br>96.44% - 97.43%<br>95.35%<br>97.33%<br>97.13% - 97.28%<br>95.21% - 97.14%                                              |
| I            | 25A         | Usnea | Usnea antarctica     | Usnea antarctica (22)<br>Usnea aurantiacoatra (40)                                                                                                                                                                                                                                                                                                                                                                                                        | MG200276.1, KJ607898.1, HQ650616.1, ...<br>KX147250.1, DQ534488.2, EF179798.1, ...                                                                                                                                                                                                                                                                                                                                                                                                                                                 | 90% - 100%<br>90% - 100%                                                                                                                                                    | 99.27% - 100%<br>98.99% - 99.71%                                                                                                                                                                                                                                 |
| I            | 37A         | Usnea | Usnea antarctica     | Usnea aurantiacoatra (21)<br>Usnea antarctica (8)                                                                                                                                                                                                                                                                                                                                                                                                         | KX147250.1, DQ534488.2, EF179799.1, ...<br>HQ650616.1, EF179795.1, KJ607898.1, ...                                                                                                                                                                                                                                                                                                                                                                                                                                                 | 96% - 100%<br>89% - 100%                                                                                                                                                    | 99.08% - 99.88%<br>99.08% - 99.64%                                                                                                                                                                                                                               |
| I            | 49A         | Usnea | Usnea antarctica     | Usnea antarctica (22)<br>Usnea aurantiacoatra (40)                                                                                                                                                                                                                                                                                                                                                                                                        | MG200277.1, KJ607898.1, HQ650616.1, ...<br>KX147245.1, DQ534488.2, EF179798.1, ...                                                                                                                                                                                                                                                                                                                                                                                                                                                 | 95% - 100%<br>95% - 100%                                                                                                                                                    | 99.54% - 100%<br>99.39% - 100%                                                                                                                                                                                                                                   |
| I            | R12A        | Usnea | Usnea antarctica     | Usnea antarctica (22)<br>Usnea aurantiacoatra (40)                                                                                                                                                                                                                                                                                                                                                                                                        | MG200277.1, KJ607898.1, HQ650616.1, ...<br>KX147245.1, DQ534488.2, EF179798.1, ...                                                                                                                                                                                                                                                                                                                                                                                                                                                 | 90% - 100%<br>90% - 100%                                                                                                                                                    | 99.31% - 100%<br>99.31% - 100%                                                                                                                                                                                                                                   |
| I            | 26B         | Usnea | Usnea antarctica     | Usnea antarctica (22)<br>Usnea aurantiacoatra (40)                                                                                                                                                                                                                                                                                                                                                                                                        | MG200280.1, EF179795.1, KJ607898.1, ...<br>KX147250.1, DQ534488.2, EF179798.1, ...                                                                                                                                                                                                                                                                                                                                                                                                                                                 | 90% - 100%<br>90% - 100%                                                                                                                                                    | 99.17% - 99.85%<br>98.89% - 99.58%                                                                                                                                                                                                                               |
| I            | 38A         | Usnea | Usnea antarctica     | Usnea antarctica (22)<br>Usnea aurantiacoatra (40)                                                                                                                                                                                                                                                                                                                                                                                                        | MG200281.1, KJ607898.1, HQ650616.1, ...<br>KX147245.1, DQ534488.2, EF179798.1, ...                                                                                                                                                                                                                                                                                                                                                                                                                                                 | 90% - 100%<br>90% - 100%                                                                                                                                                    | 99.01% - 100%<br>99.01% - 99.72%                                                                                                                                                                                                                                 |
| I            | 105A        | Usnea | Usnea antarctica     | Usnea antarctica (22)<br>Usnea aurantiacoatra (40)                                                                                                                                                                                                                                                                                                                                                                                                        | MG200277.1, KJ607898.1, HQ650616.1, ...<br>KX147245.1, DQ534488.2, EF179798.1, ...                                                                                                                                                                                                                                                                                                                                                                                                                                                 | 90% - 100%<br>90% - 100%                                                                                                                                                    | 99.29% - 100%<br>99.29% - 100%                                                                                                                                                                                                                                   |
| I            | 7A1         | Usnea | Usnea antarctica     | Usnea antarctica (22)<br>Usnea aurantiacoatra (40)                                                                                                                                                                                                                                                                                                                                                                                                        | MG200276.1, HQ650616.1, EF179795.1, ...<br>KX147245.1, DQ534488.2, MG200305.1, ...                                                                                                                                                                                                                                                                                                                                                                                                                                                 | 81% - 100%<br>81% - 100%                                                                                                                                                    | 99.15% - 100%<br>99.03% - 99.76%                                                                                                                                                                                                                                 |
| I            | 29A         | Usnea | Usnea antarctica     | Usnea aurantiacoatra (21)<br>Usnea antarctica (8)                                                                                                                                                                                                                                                                                                                                                                                                         | KX147245.1, DQ534488.2, EF179799.1, ...<br>HQ650616.1, EF179795.1, KJ607898.1, ...                                                                                                                                                                                                                                                                                                                                                                                                                                                 | 94% - 100%<br>88% - 100%                                                                                                                                                    | 99.20% - 99.89%<br>98.75% - 99.76%                                                                                                                                                                                                                               |
| I            | 43A         | Usnea | Usnea antarctica     | Usnea aurantiacoatra (21)<br>Usnea antarctica (8)                                                                                                                                                                                                                                                                                                                                                                                                         | KX147245.1, DQ534488.2, EF179799.1, ...<br>HQ650616.1, EF179795.1, KJ607898.1, ...                                                                                                                                                                                                                                                                                                                                                                                                                                                 | 95% - 100%<br>92% - 100%                                                                                                                                                    | 99.29% - 100%<br>98.93% - 99.88%                                                                                                                                                                                                                                 |
| I            | 40A         | Usnea | Usnea antarctica     | Usnea aurantiacoatra (21)<br>Usnea antarctica (8)                                                                                                                                                                                                                                                                                                                                                                                                         | KX147245.1, DQ534488.2, EF179799.1, ...<br>KJ607898.1, HQ650616.1, EF179795.1, ...                                                                                                                                                                                                                                                                                                                                                                                                                                                 | 100%<br>92% - 100%                                                                                                                                                          | 99.16% - 99.88%<br>99.28% - 99.76%                                                                                                                                                                                                                               |
| I            | 48A         | Usnea | Usnea antarctica     | Usnea antarctica (22)<br>Usnea aurantiacoatra (40)                                                                                                                                                                                                                                                                                                                                                                                                        | MG200287.1, KJ607898.1, HQ650616.1, ...<br>KX147245.1, DQ534488.2, MG200305.1, ...                                                                                                                                                                                                                                                                                                                                                                                                                                                 | 84% - 100%<br>84% - 100%                                                                                                                                                    | 99.36% - 100%<br>99.25% - 99.87%                                                                                                                                                                                                                                 |
| I            | 20A         | Usnea | Usnea antarctica     | Usnea aurantiacoatra (21)<br>Usnea antarctica (8)                                                                                                                                                                                                                                                                                                                                                                                                         | KX147250.1, DQ534488.2, EF179797.1, ...<br>HQ650616.1, EF179795.1, KJ607898.1, ...                                                                                                                                                                                                                                                                                                                                                                                                                                                 | 98% - 100%<br>91% - 100%                                                                                                                                                    | 98.94% - 99.76%<br>99.06% - 99.53%                                                                                                                                                                                                                               |
| I            | 28A         | Usnea | Usnea antarctica     | Usnea aurantiacoatra (21)<br>Usnea antarctica (8)                                                                                                                                                                                                                                                                                                                                                                                                         | KX147249.1, DQ534488.2, EF179799.1, ...<br>KJ607898.1, EF179796.1, HQ650616.1, ...                                                                                                                                                                                                                                                                                                                                                                                                                                                 | 97% - 100%<br>91% - 100%                                                                                                                                                    | 99.17% - 99.88%<br>98.70% - 99.76%                                                                                                                                                                                                                               |
| I            | 16B         | Usnea | Usnea aurantiacoatra | Usnea aurantiacoatra (40)<br>Usnea antarctica (22)                                                                                                                                                                                                                                                                                                                                                                                                        | KX147243.1, MG200293.1, DQ534488.2, ...<br>KJ607898.1, EF179796.1, MG200277.1, ...                                                                                                                                                                                                                                                                                                                                                                                                                                                 | 80% - 100%<br>80% - 100%                                                                                                                                                    | 99.10% - 99.88%<br>99.03% - 99.76%                                                                                                                                                                                                                               |
| I            | 31A         | Usnea | Usnea antarctica     | Usnea aurantiacoatra (21)<br>Usnea antarctica (8)                                                                                                                                                                                                                                                                                                                                                                                                         | KX147249.1, DQ534488.2, EF179799.1, ...<br>KJ607898.1, EF179796.1, HQ650616.1, ...                                                                                                                                                                                                                                                                                                                                                                                                                                                 | 97% - 100%<br>91% - 100%                                                                                                                                                    | 99.06% - 99.76%<br>98.70% - 99.65%                                                                                                                                                                                                                               |
| I            | 18C         | Usnea | Usnea aurantiacoatra | Usnea aurantiacoatra (40)<br>Usnea antarctica (22)                                                                                                                                                                                                                                                                                                                                                                                                        | KX147243.1, MG200293.1, DQ534488.2, ...<br>KJ607898.1, EF179796.1, MG200277.1, ...                                                                                                                                                                                                                                                                                                                                                                                                                                                 | 89% - 100%<br>89% - 100%                                                                                                                                                    | 99.25% - 100%<br>99.19% - 99.87%                                                                                                                                                                                                                                 |
| I            | 32A         | Usnea | Usnea antarctica     | Usnea aurantiacoatra (40)<br>Usnea antarctica (22)                                                                                                                                                                                                                                                                                                                                                                                                        | MG200296.1, KX147249.1, DQ534488.2, ...<br>MG200277.1, KJ607898.1, EF179796.1, ...                                                                                                                                                                                                                                                                                                                                                                                                                                                 | 82% - 99%<br>82% - 99%                                                                                                                                                      | 98.63% - 99.70%<br>98.38% - 99.55%                                                                                                                                                                                                                               |
| I            | 19A         | Usnea | Usnea aurantiacoatra | Usnea antarctica (8)<br>Usnea aurantiacoatra (21)                                                                                                                                                                                                                                                                                                                                                                                                         | EF179795.1, HQ650616.1, KJ607898.1, ...<br>KX147245.1, DQ534488.2, EF179799.1, ...                                                                                                                                                                                                                                                                                                                                                                                                                                                 | 90% - 100%<br>97% - 100%                                                                                                                                                    | 98.95% - 99.76%<br>98.96% - 99.65%                                                                                                                                                                                                                               |
| I            | 52A4        | Usnea | Usnea antarctica     | Usnea antarctica (22)<br>Usnea aurantiacoatra (40)                                                                                                                                                                                                                                                                                                                                                                                                        | KJ607898.1, EF179796.1, MG200277.1, ...<br>KX147253.1, DQ534488.2, MG200296.1, ...                                                                                                                                                                                                                                                                                                                                                                                                                                                 | 91% - 100%<br>91% - 100%                                                                                                                                                    | 99.31% - 100%<br>99.25% - 100%                                                                                                                                                                                                                                   |

|     |          |             |                      |                                                                                                                                                 |                                                                                                                                          |                                         |                                                              |
|-----|----------|-------------|----------------------|-------------------------------------------------------------------------------------------------------------------------------------------------|------------------------------------------------------------------------------------------------------------------------------------------|-----------------------------------------|--------------------------------------------------------------|
| I   | 27A      | Usnea       | Usnea antarctica     | Usnea aurantiacoatra (21)<br>Usnea antarctica (8)                                                                                               | KX147250.1, DQ534488.2, EF179799.1, ...<br>HQ650616.1, EF179795.1, KJ607898.1, ...                                                       | 94% - 100%<br>88% - 100%                | 98.75% - 99.77%<br>98.74% - 99.52%                           |
| I   | 45A      | Usnea       | Usnea antarctica     | Usnea aurantiacoatra (21)<br>Usnea antarctica (8)                                                                                               | KX147245.1, DQ534488.2, EF179799.1, ...<br>HQ650616.1, EF179795.1, KJ607898.1, ...                                                       | 98% - 100%<br>91% - 100%                | 99.18% - 99.88%<br>99.06% - 99.76%                           |
| II  | 62A1     | Ochrolechia | Ochrolechia frigida  | Ochrolechia frigida (11)<br>Ochrolechia tartarea (2)<br>Uncultured fungus (2)                                                                   | KP314449.1, DQ534474.2, KP314435.1, ...<br>DQ219304.1, OM397073.1<br>KC965169.1, KC965437.1                                              | 88% - 100%<br>88% - 100%<br>93% - 100%  | 96.77% - 100%<br>96.92% - 99.82%<br>96.93% - 97.48%          |
| II  | 61A5     | Ochrolechia | Ochrolechia frigida  | Ochrolechia frigida (13)<br>Ochrolechia tartarea (2)<br>Uncultured fungus (2)                                                                   | KP314449.1, DQ534474.2, KR017062.1, ...<br>DQ219304.1, OM397073.1<br>KC965169.1, KC965437.1                                              | 81% - 100%<br>87% - 100%<br>92% - 100%  | 95.12% - 100%<br>97.15% - 99.83%<br>97.17% - 97.65%          |
| II  | 77A1     | Ochrolechia | Ochrolechia frigida  | Ochrolechia tartarea (2)<br>Ochrolechia frigida (12)<br>Uncultured fungus (2)                                                                   | DQ219304.1, OM397073.1<br>KP314449.1, DQ534474.2, HQ650675.1, ...<br>KC965169.1, KC965437.1                                              | 87% - 100%<br>80% - 100%<br>91% - 100%  | 96.97% - 99.84%<br>95.12% - 99.81%<br>96.87% - 97.48%        |
| II  | 56A_Sup  | Ochrolechia | Ochrolechia frigida  | Ochrolechia frigida (11)<br>Ochrolechia tartarea (2)<br>Uncultured fungus (2)                                                                   | KP314449.1, DQ534474.2, HQ650675.1, ...<br>DQ219304.1, OM397073.1<br>KC965169.1, KC965437.1                                              | 87% - 100%<br>86% - 100%<br>91% - 100%  | 96.77% - 100%<br>96.92% - 99.82%<br>96.96% - 97.48%          |
| II  | 44A      | Ochrolechia | Ochrolechia frigida  | Ochrolechia frigida (11)<br>Ochrolechia tartarea (2)<br>Uncultured fungus (2)                                                                   | KP954318.1, HQ650675.1, DQ534474.2, ...<br>DQ219304.1, OM397073.1<br>KC965169.1, KC965437.1                                              | 96% - 100%<br>95% - 100%<br>100%        | 95.90% - 99.76%<br>96.31% - 99.30%<br>97.18% - 97.42%        |
| II  | 45B_Sup  | Ochrolechia | Ochrolechia frigida  | Ochrolechia tartarea (2)<br>Ochrolechia frigida (11)<br>Uncultured fungus (2)                                                                   | DQ219304.1, OM397073.1<br>DQ534474.2, KP314449.1, HQ650675.1, ...<br>KC965169.1, KC965437.1                                              | 84% - 100%<br>84% - 100%<br>89% - 100%  | 96.71% - 100%<br>96.57% - 100%<br>96.71% - 97.28%            |
| II  | 68A3_Sup | Ochrolechia | Ochrolechia frigida  | Ochrolechia frigida (11)<br>Ochrolechia tartarea (2)<br>Uncultured fungus (2)                                                                   | KP314449.1, DQ534474.2, HQ650675.1, ...<br>DQ219304.1, OM397073.1<br>KC965169.1, KC965437.1                                              | 87% - 100%<br>86% - 100%<br>91% - 100%  | 96.77% - 100%<br>96.92% - 99.82%<br>96.96% - 97.48%          |
| II  | 29B      | Ochrolechia | Ochrolechia frigida  | Ochrolechia frigida (2)<br>Ochrolechia tartarea (1)<br>Uncultured fungus (2)                                                                    | DQ534474.2, HQ650675.1<br>DQ219304.1<br>KC965169.1, KC965437.1                                                                           | 100%<br>100%<br>82% - 96%               | 98.75% - 99.46%<br>99.46%<br>96.67% - 97.39%                 |
| II  | 36C      | Ochrolechia | Ochrolechia frigida  | Ochrolechia frigida (11)<br>Ochrolechia tartarea (2)<br>Uncultured fungus (2)                                                                   | KP314449.1, DQ534474.2, HQ650675.1, ...<br>DQ219304.1, OM397073.1<br>KC965169.1, KC965437.1                                              | 85% - 100%<br>84% - 100%<br>90% - 100%  | 96.25% - 99.77%<br>96.42% - 99.59%<br>96.55% - 97.09%        |
| II  | 54A3     | Ochrolechia | Ochrolechia frigida  | Ochrolechia frigida (10)<br>Uncultured fungus (2)<br>Ochrolechia tartarea (2)                                                                   | KR017062.1, KP314449.1, DQ534474.2, ...<br>KC965169.1, KC965437.1<br>DQ219304.1, OM397073.1                                              | 95% - 100%<br>100%<br>94% - 100%        | 96.63% - 98.02%<br>96.95% - 97.17%<br>96.33% - 97.17%        |
| II  | 60A4     | Ochrolechia | Ochrolechia frigida  | Ochrolechia frigida (10)<br>Uncultured fungus (2)<br>Ochrolechia tartarea (2)                                                                   | KP314360.1, DQ534474.2, HQ650675.1, ...<br>KC965169.1, KC965437.1<br>DQ219304.1, OM397073.1                                              | 81% - 100%<br>85% - 98%<br>80% - 100%   | 96.22% - 99.6%<br>96.36% - 96.94%<br>96.36% - 99.02%         |
| II  | 61A1     | Ochrolechia | Ochrolechia frigida  | Ochrolechia frigida (12)<br>Uncultured fungus (2)<br>Ochrolechia tartarea (2)                                                                   | KP314449.1, HQ650675.1, DQ534474.2, ...<br>KC965169.1, KC965437.1<br>DQ219304.1, OM397073.1                                              | 88% - 98%<br>98%<br>96% - 98%           | 95.13% - 99.81%<br>97.44% - 97.62%<br>97% - 99.63%           |
| II  | 61A4     | Ochrolechia | Ochrolechia frigida  | Ochrolechia frigida (10)<br>Uncultured fungus (2)<br>Ochrolechia tartarea (2)                                                                   | KP314449.1, DQ534474.2, HQ650675.1, ...<br>KC965169.1, KC965437.1<br>DQ219304.1, OM397073.1                                              | 81% - 99%<br>85% - 98%<br>80% - 99%     | 96.27% - 99.41%<br>96.23% - 96.99%<br>96.41% - 98.87%        |
| III | 69A1     | Placopsis   | Placopsis antarctica | Placopsis antarctica (42)<br>Placopsis parellina (1)<br>Placopsis contortuplicata (11)                                                          | MH670329.1, MH670328.1, MH670327.1, ...<br>AY212822.1<br>DQ534479.2, MH670336.1, AY212818.1, ...                                         | 100%<br>100%<br>96% - 100%              | 98.62% - 100%<br>100%<br>97.06% - 98.82%                     |
| III | 7B2      | Placopsis   | Placopsis antarctica | Placopsis antarctica (42)<br>Placopsis parellina (1)<br>Placopsis contortuplicata (11)                                                          | MH670325.1, MH670324.1, MH670322.1, ...<br>AY212822.1<br>DQ534479.2, MH670336.1, AY212818.1, ...                                         | 100%<br>100%<br>97% - 100%              | 98.41% - 100%<br>99.80%<br>97.22% - 98.61%                   |
| III | 33D      | Placopsis   | Placopsis antarctica | Placopsis antarctica (42)<br>Placopsis parellina (1)<br>Placopsis contortuplicata (11)                                                          | MH670329.1, MH670328.1, MH670327.1, ...<br>AY212822.1<br>DQ534479.2, MH670336.1, AY212818.1, ...                                         | 100%<br>100%<br>95% - 100%              | 98.63% - 100%<br>100%<br>97.08% - 98.83%                     |
| III | 13A      | Placopsis   | Placopsis antarctica | Placopsis antarctica (43)<br>Placopsis parellina (1)<br>Placopsis contortuplicata (11)<br>Placopsis stellata (1)<br>Placopsis rhodophthalma (2) | MH670331.1, MH670329.1, MH670328.1, ...<br>AY212822.1<br>DQ534479.2, MH670336.1, KT601492.1, ...<br>AY212827.1<br>AY212825.1, AY212824.1 | 87% - 100%<br>100%<br>99%<br>99%<br>99% | 98.26% - 100%<br>100%<br>97.51% - 99.01%<br>95.53%<br>95.27% |
| III | 75A1     | Placopsis   | Placopsis antarctica | Placopsis antarctica (42)<br>Placopsis parellina (1)<br>Placopsis contortuplicata (11)                                                          | MH670329.1, MH670328.1, MH670327.1, ...<br>AY212822.1<br>DQ534479.2, MH670336.1, AY212818.1, ...                                         | 100%<br>100%<br>97% - 100%              | 98.61% - 100%<br>100%<br>97.02% - 98.81%                     |
| III | 96A      | Placopsis   | Placopsis antarctica | Placopsis antarctica (42)<br>Placopsis parellina (1)<br>Placopsis contortuplicata (11)                                                          | MH670331.1, MH670329.1, MH670328.1, ...<br>AY212822.1<br>DQ534479.2, MH670336.1, AY212818.1, ...                                         | 99%<br>96%<br>88% - 99%                 | 98.20% - 99.64%<br>99.44%<br>96.44% - 98.38%                 |
| III | 16A      | Placopsis   | Placopsis antarctica | Placopsis antarctica (42)<br>Placopsis parellina (1)<br>Placopsis contortuplicata (11)                                                          | MH670329.1, MH670328.1, MH670327.1, ...<br>AY212822.1<br>DQ534479.2, MH670336.1, AY212818.1, ...                                         | 100%<br>100%<br>98% - 100%              | 98.59% - 100%<br>100.00%<br>96.99% - 98.80%                  |
| III | 97A1     | Placopsis   | Placopsis antarctica | Placopsis antarctica (42)<br>Placopsis parellina (1)<br>Placopsis contortuplicata (11)                                                          | MH670331.1, MH670329.1, MH670328.1, ...<br>AY212822.1<br>DQ534479.2, KC414624.1, MH670336.1, ...                                         | 98%<br>95%<br>87% - 98%                 | 98.19% - 99.64%<br>99.44%<br>96.64% - 98.38%                 |
| III | 10B2     | Placopsis   | Placopsis antarctica | Placopsis antarctica (42)<br>Placopsis parellina (1)<br>Placopsis contortuplicata (11)                                                          | MH670325.1, MH670324.1, MH670322.1, ...<br>AY212822.1<br>DQ534479.2, MH670336.1, AY212818.1, ...                                         | 100%<br>100%<br>97% - 100%              | 98.41% - 100%<br>99.80%<br>97.22% - 98.61%                   |
| III | 6B       | Placopsis   | Placopsis antarctica | Placopsis antarctica (42)<br>Placopsis parellina (1)<br>Placopsis contortuplicata (11)<br>Placopsis stellata (1)                                | MH670329.1, MH670328.1, MH670327.1, ...<br>AY212822.1<br>DQ534479.2, MH670336.1, AY212818.1, ...<br>AY212827.1                           | 99%<br>96%<br>87% - 99%<br>95%          | 98.74% - 100%<br>100%<br>96.84% - 98.92%<br>95.14%           |
| III | 18D      | Placopsis   | Placopsis antarctica | Placopsis antarctica (43)<br>Placopsis parellina (1)<br>Placopsis contortuplicata (11)<br>Placopsis stellata (1)                                | MH670331.1, MH670329.1, MH670328.1, ...<br>AY212822.1<br>DQ534479.2, MH670336.1, AY212818.1, ...<br>AY212827.1                           | 84% - 100%<br>100%<br>97% - 100%<br>99% | 98.45% - 100%<br>100%<br>97.35% - 98.90%<br>95.36%           |
| III | 78A      | Placopsis   | Placopsis antarctica | Placopsis antarctica (42)<br>Placopsis parellina (1)<br>Placopsis contortuplicata (11)                                                          | MH670325.1, MH670324.1, MH670322.1, ...<br>AY212822.1<br>DQ534479.2, MH670336.1, AY212818.1, ...                                         | 100%<br>100%<br>97% - 100%              | 98.41% - 100%<br>99.80%<br>97.22% - 98.61%                   |
| III | 10F2     | Placopsis   | Placopsis antarctica | Placopsis antarctica (42)<br>Placopsis parellina (1)<br>Placopsis contortuplicata (11)                                                          | MH670329.1, MH670328.1, MH670327.1, ...<br>AY212822.1<br>DQ534479.2, MH670336.1, AY212818.1, ...                                         | 100%<br>100%<br>98% - 100%              | 98.59% - 100%<br>100%<br>96.99% - 98.80%                     |
| III | 18E      | Placopsis   | Placopsis antarctica | Placopsis antarctica (42)<br>Placopsis parellina (1)<br>Placopsis contortuplicata (11)                                                          | MH670329.1, MH670328.1, MH670327.1, ...<br>AY212822.1<br>DQ534479.2, MH670336.1, AY212818.1, ...                                         | 100%<br>100%<br>98% - 100%              | 98.59% - 100%<br>100%<br>96.99% - 98.80%                     |
| III | 80A2     | Placopsis   | Placopsis antarctica | Placopsis antarctica (42)<br>Placopsis parellina (1)<br>Placopsis contortuplicata (11)                                                          | MH670325.1, MH670324.1, MH670322.1, ...<br>AY212822.1<br>DQ534479.2, MH670336.1, AY212818.1, ...                                         | 100%<br>100%<br>96% - 100%              | 98.24% - 99.80%<br>99.61%<br>96.84% - 98.44%                 |
| III | 6D       | Placopsis   | Placopsis antarctica | Placopsis antarctica (42)<br>Placopsis parellina (1)<br>Placopsis contortuplicata (11)                                                          | MH670329.1, MH670328.1, MH670327.1, ...<br>AY212822.1<br>DQ534479.2, MH670336.1, AY212818.1, ...                                         | 100%<br>100%<br>96% - 100%              | 99.41% - 100%<br>100%<br>97.06% - 98.83%                     |
| III | 13B      | Placopsis   | Placopsis antarctica | Placopsis antarctica (42)<br>Placopsis parellina (1)<br>Placopsis contortuplicata (11)                                                          | MH670325.1, MH670324.1, MH670322.1, ...<br>AY212822.1<br>DQ534479.2, KC414624.1, MH670336.1, ...                                         | 100%<br>96%<br>88% - 100%               | 98.38% - 99.82%<br>99.63%<br>97.04% - 98.56%                 |
| III | 81A4     | Placopsis   | Placopsis antarctica | Placopsis antarctica (43)<br>Placopsis parellina (1)                                                                                            | MH670331.1, MH670329.1, MH670328.1, ...<br>AY212822.1                                                                                    | 81% - 100%<br>100%                      | 98.32% - 100%<br>100%                                        |

|      |          |             |                          |                                    |                                         |            |                 |
|------|----------|-------------|--------------------------|------------------------------------|-----------------------------------------|------------|-----------------|
| III  | 11D      | Placopsis   | Placopsis antarctica     | Placopsis contortuplicata (11)     | DQ534479.2, MH670336.1, KT601492.1, ... | 100%       | 97.60% - 99.28% |
|      |          |             |                          | Placopsis stellata (1)             | AY212827.1                              | 100%       | 95.92%          |
|      |          |             |                          | Placopsis rhodophthalma (2)        | AY212824.1, AY212825.1                  | 100%       | 95.20% - 95.44% |
|      |          |             |                          | Placopsis antarctica (42)          | MH670329.1, MH670328.1, MH670327.1, ... | 99%        | 98.56% - 99.82% |
| III  | 19D1     | Placopsis   | Placopsis antarctica     | Placopsis parellina (1)            | AY212822.1                              | 95%        | 99.81%          |
|      |          |             |                          | Placopsis contortuplicata (11)     | DQ534479.2, KC414624.1, MH670336.1, ... | 90% - 99%  | 96.84% - 98.74% |
|      |          |             |                          | Placopsis antarctica (42)          | MH670329.1, MH670328.1, MH670327.1, ... | 100%       | 98.36% - 100%   |
|      |          |             |                          | Placopsis parellina (1)            | AY212822.1                              | 97%        | 99.63%          |
| III  | 83A      | Placopsis   | Placopsis antarctica     | Placopsis contortuplicata (11)     | DQ534479.2, KC414624.1, MH670336.1, ... | 89% - 100% | 96.84% - 98.55% |
|      |          |             |                          | Placopsis antarctica (42)          | MH670329.1, MH670328.1, MH670327.1, ... | 100%       | 98.41% - 99.80% |
|      |          |             |                          | Placopsis parellina (1)            | AY212822.1                              | 100%       | 99.80%          |
|      |          |             |                          | Placopsis contortuplicata (11)     | DQ534479.2, MH670336.1, AY212818.1, ... | 97% - 100% | 96.83% - 98.61% |
| III  | 11A1     | Placopsis   | Placopsis antarctica     | Placopsis antarctica (42)          | MH670329.1, MH670328.1, MH670327.1, ... | 100%       | 98.61% - 100%   |
|      |          |             |                          | Placopsis parellina (1)            | AY212822.1                              | 100%       | 100%            |
|      |          |             |                          | Placopsis contortuplicata (11)     | DQ534479.2, MH670336.1, AY212818.1, ... | 97% - 100% | 97.02% - 98.81% |
|      |          |             |                          | Placopsis antarctica (42)          | MH670329.1, MH670328.1, MH670327.1, ... | 100%       | 98.61% - 100%   |
| III  | 59A      | Placopsis   | Placopsis antarctica     | Placopsis parellina (1)            | AY212822.1                              | 100%       | 100.00%         |
|      |          |             |                          | Placopsis contortuplicata (11)     | DQ534479.2, MH670336.1, AY212818.1, ... | 97% - 100% | 97.02% - 98.81% |
|      |          |             |                          | Placopsis antarctica (42)          | MH670331.1, MH670329.1, MH670328.1, ... | 99% - 100% | 98.56% - 100%   |
|      |          |             |                          | Placopsis parellina (1)            | AY212822.1                              | 96%        | 99.81%          |
| IV-a | 49C_Bot  | Caloplaca   | Polycauliona regalis     | Placopsis contortuplicata (11)     | DQ534479.2, MH670336.1, AY212818.1, ... | 87% - 99%  | 96.64% - 98.74% |
|      |          |             |                          | Caloplaca regalis (1)              | EU161240.1                              | 100%       | 99.62%          |
|      |          |             |                          | Gondwania regalis (3)              | KC179103.1, KJ133463.1, KJ133462.1      | 95% - 98%  | 99.03% - 99.40% |
|      |          |             |                          | Gondwania cribosa (1)              | KC179102.1                              | 95%        | 96.40%          |
| IV-b | 49E_Mid  | Caloplaca   | Caloplaca sp.            | Gondwania sp. (1)                  | KC179104.1                              | 83%        | 97.23%          |
|      |          |             |                          | Caloplaca sublobulata (1)          | DQ534455.2                              | 100%       | 96.25%          |
|      |          |             |                          | Gondwania sejongensis (3)          | KJ133467.1, KJ133466.1, KJ133465.1      | 98%        | 95.14% - 95.31% |
|      |          |             |                          | Caloplaca sublobulata (1)          | DQ534455.2                              | 99%        | 95.19%          |
| V-a  | 77A4     | Umbilicaria | Umbilicaria decussata    | Gondwania sejongensis (1)          | KJ133467.1                              | 86%        | 96.01%          |
|      |          |             |                          | Umbilicaria krascheninnikovii (1)  | AY603134.1                              | 100%       | 100%            |
|      |          |             |                          | Umbilicaria decussata (16)         | HM161510.1, AY603122.1, KY947809.1, ... | 92% - 100% | 95.81% - 98.79% |
|      |          |             |                          | Umbilicaria polaris (3)            | KY947830.1, KY947747.1, KY947759.1      | 97%        | 97.31% - 97.71% |
| V-a  | 93A      | Umbilicaria | Umbilicaria decussata    | Umbilicaria aprina (16)            | FN185930.1, JX036075.1, KP314390.1, ... | 95% - 100% | 95% - 96.96%    |
|      |          |             |                          | Umbilicaria virginis (19)          | MZ244153.1, KY947767.1, AF297673.1, ... | 94% - 100% | 96.11% - 96.84% |
|      |          |             |                          | uncultured eukaryote (1)           | LC487926.1                              | 100%       | 96.57%          |
|      |          |             |                          | Umbilicaria proboscidea (12)       | MH302526.1, FR799304.1, KY266839.1, ... | 90% - 100% | 95.54% - 96.41% |
| V-a  | 62A4_Bot | Umbilicaria | Umbilicaria sp.          | Umbilicaria polyrrhiza (5)         | KY947838.1, JQ764737.1, MK812352.1, ... | 96% - 100% | 95.09% - 95.77% |
|      |          |             |                          | Umbilicaria kappenii (3)           | AY603130.1, AY603132.1, AY603131.1      | 93% - 99%  | 95.14% - 95.67% |
|      |          |             |                          | Umbilicaria antarctica (4)         | AY603124.1, AY603128.1, AJ431605.1, ... | 96% - 99%  | 95.03% - 95.61% |
|      |          |             |                          | Umbilicaria havaasii (4)           | KY947742.1, JQ764739.1, KY947858.1, ... | 95% - 100% | 95.1% - 95.57%  |
| V-b  | 52A3     | Umbilicaria | Umbilicaria sp.          | Umbilicaria sp.                    | MZ244150.1                              | 96%        | 95.43%          |
|      |          |             |                          | Umbilicaria altaiensis (1)         | KY947786.1                              | 97%        | 95.22%          |
|      |          |             |                          | Umbilicaria pulvinaria (1)         | KY947735.1                              | 100%       | 95.14%          |
|      |          |             |                          | Umbilicaria africana (1)           | KY947844.1                              | 99%        | 95.14%          |
| V-b  | 52A3     | Umbilicaria | Umbilicaria sp.          | Umbilicaria formosana (1)          | KY947733.1                              | 99%        | 95.13%          |
|      |          |             |                          | Umbilicaria maculata (1)           | KY947794.1                              | 97%        | 95.01%          |
|      |          |             |                          | Umbilicaria krascheninnikovii (1)  | AY603134.1                              | 100%       | 99.79%          |
|      |          |             |                          | Umbilicaria decussata (16)         | HM161510.1, AY603122.1, KY947809.1, ... | 93% - 100% | 95.59% - 98.57% |
| V-b  | 62A4_Bot | Umbilicaria | Umbilicaria sp.          | Umbilicaria polaris (3)            | KY947830.1, KY947747.1, KY947759.1      | 99%        | 97.10% - 97.51% |
|      |          |             |                          | Umbilicaria aprina (15)            | FN185930.1, JX036075.1, KP314390.1, ... | 97% - 100% | 95.04% - 96.70% |
|      |          |             |                          | Umbilicaria virginis (19)          | MZ244158.1, KY947767.1, AF297673.1, ... | 96% - 100% | 95.88% - 96.62% |
|      |          |             |                          | uncultured eukaryote (1)           | LC487926.1                              | 100%       | 96.30%          |
| V-b  | 52A3     | Umbilicaria | Umbilicaria sp.          | Umbilicaria proboscidea (12)       | MH302526.1, FR799304.1, KY266839.1, ... | 91% - 100% | 95.26% - 96.20% |
|      |          |             |                          | Umbilicaria polyrrhiza (2)         | KY947838.1, JQ764737.1                  | 97% - 100% | 95.18% - 95.48% |
|      |          |             |                          | Umbilicaria kappenii (1)           | AY603130.1                              | 93%        | 95.36%          |
|      |          |             |                          | Umbilicaria havaasii (2)           | JQ764739.1, KY947742.1                  | 96% - 100% | 95.29% - 95.34% |
| V-b  | 52A3     | Umbilicaria | Umbilicaria sp.          | Umbilicaria antarctica (1)         | AY603124.1                              | 96%        | 95.31%          |
|      |          |             |                          | Umbilicaria sp. (1)                | MZ244150.1                              | 98%        | 95.22%          |
|      |          |             |                          | Umbilicaria hyperborea (1)         | KY947744.1                              | 98%        | 95.17%          |
|      |          |             |                          | Umbilicaria altaiensis (1)         | KY947786.1                              | 99%        | 95.11%          |
| V-b  | 52A3     | Umbilicaria | Umbilicaria sp.          | Umbilicaria aprina (17)            | KY947808.1, JQ739981.1, JX036075.1, ... | 95% - 100% | 95.56% - 100%   |
|      |          |             |                          | Umbilicaria africana (3)           | KY947844.1, HM161482.1, KY947743.1      | 100%       | 95.56% - 99.80% |
|      |          |             |                          | Umbilicaria krascheninnikovii (2)  | JQ739994.1, KY947752.1                  | 97% - 98%  | 95.12% - 97.11% |
|      |          |             |                          | Umbilicaria antarctica (35)        | AY603124.1, KR053313.1, JQ739980.1, ... | 94% - 100% | 95.16% - 96.59% |
| V-b  | 52A3     | Umbilicaria | Umbilicaria sp.          | Umbilicaria kappenii (7)           | AY603130.1, AY603132.1, AY603131.1, ... | 91% - 100% | 95.28% - 96.47% |
|      |          |             |                          | Umbilicaria proboscidea (11)       | MK811704.1, KY266839.1, FR799304.1, ... | 89% - 100% | 95.21% - 96.39% |
|      |          |             |                          | Umbilicaria formosana (3)          | JQ739988.1, KY947733.1, KY947806.1      | 97% - 100% | 95.33% - 96.07% |
|      |          |             |                          | Umbilicaria decussata (11)         | KY947795.1, KP314408.1, HM161501.1, ... | 91% - 100% | 95.15% - 96.05  |
| V-b  | 52A3     | Umbilicaria | Umbilicaria sp.          | Umbilicaria rhizinata (1)          | KY948011.1                              | 100%       | 95.98%          |
|      |          |             |                          | Umbilicaria virginis (11)          | KY947832.1, KY947767.1, MZ244162.1, ... | 98% - 100% | 95.06% - 95.96% |
|      |          |             |                          | uncultured eukaryote (1)           | LC487926.1                              | 100%       | 95.96%          |
|      |          |             |                          | Umbilicaria havaasii (2)           | KY947742.1, JQ764739.1                  | 96% - 97%  | 95.01% - 95.68% |
| V-b  | 52A3     | Umbilicaria | Umbilicaria sp.          | Umbilicaria polaris (2)            | KY947759.1, KY947830.1                  | 96% - 99%  | 95.43% - 95.53% |
|      |          |             |                          | Umbilicaria maculata (1)           | KY947793.1                              | 93%        | 95.27%          |
|      |          |             |                          | Umbilicaria polyrrhiza (2)         | KY947838.1, JQ764737.1                  | 97% - 100% | 95.05% - 95.16% |
|      |          |             |                          | Umbilicaria altaiensis (1)         | KY947786.1                              | 99%        | 95.11%          |
| VI-a | 27B      | Rhizocarpon | Rhizocarpon aff. geograp | Umbilicaria aprina (17)            | KY947808.1, JQ739981.1, JX036075.1, ... | 88% - 100% | 95.21% - 98.90% |
|      |          |             |                          | Umbilicaria africana (3)           | KY947844.1, HM161482.1, KY947743.1      | 99% - 100% | 95.60% - 98.72% |
|      |          |             |                          | Umbilicaria krascheninnikovii (1)  | JQ739994.1                              | 96%        | 96.77%          |
|      |          |             |                          | Umbilicaria antarctica (31)        | JQ739980.1, AY603124.1, KR053313.1, ... | 87% - 100% | 95.15% - 95.98% |
| VI-a | 66A1     | Rhizocarpon | Rhizocarpon aff. geograp | Umbilicaria rhizinata (1)          | KY948011.1                              | 100%       | 95.96%          |
|      |          |             |                          | Umbilicaria formosana (2)          | JQ739988.1, KY947733.1                  | 96% - 100% | 95.60% - 95.82% |
|      |          |             |                          | Umbilicaria kappenii (6)           | AY603132.1, AY603130.1, AJ431599.1, ... | 84% - 100% | 95.13% - 95.79% |
|      |          |             |                          | Umbilicaria proboscidea (8)        | KY266839.1, FR799304.1, ON362174.1, ... | 89% - 99%  | 95.18% - 95.76% |
| VI-a | 26E      | Rhizocarpon | Rhizocarpon aff. geograp | Umbilicaria decussata (11)         | KP314408.1, KY947795.1, HM161501.1, ... | 83% - 100% | 95% - 95.68%    |
|      |          |             |                          | Umbilicaria virginis (2)           | KY947832.1, KY947767.1                  | 97% - 100% | 95.29% - 95.60% |
|      |          |             |                          | uncultured eukaryote (1)           | LC487926.1                              | 99%        | 95.57%          |
|      |          |             |                          | Umbilicaria polaris (1)            | KY947759.1                              | 97%        | 95.29%          |
| VI-a | 27B      | Rhizocarpon | Rhizocarpon aff. geograp | Umbilicaria polaris (1)            | KY947759.1                              | 97%        | 95.29%          |
|      |          |             |                          | Rhizocarpon geographicum (29)      | DQ534482.1, KC740079.1, KC740059.1, ... | 100%       | 95.02% - 99.75% |
|      |          |             |                          | Rhizocarpon nidificum (1)          | DQ534483.2                              | 100%       | 99.75%          |
|      |          |             |                          | Rhizocarpon aff. geographicum (21) | MZ244025.1, MZ244023.1, MZ244020.1, ... | 100%       | 95.02% - 99.25% |
| VI-a | 66A1     | Rhizocarpon | Rhizocarpon aff. geograp | Rhizocarpon sp. (1)                | OM065444.1                              | 100%       | 95.07%          |
|      |          |             |                          | Rhizocarpon saanaense (2)          | MZ188989.1, MZ188988.1                  | 100%       | 95.04%          |
|      |          |             |                          | Rhizocarpon geographicum (30)      | DQ534482.1, KC740079.1, KC740059.1, ... | 99% - 100% | 95.14% - 100%   |
|      |          |             |                          | Rhizocarpon nidificum (1)          | DQ534483.2                              | 100%       | 100%            |
| VI-a | 26E      | Rhizocarpon | Rhizocarpon aff. geograp | Rhizocarpon aff. geographicum (21) | MZ244025.1, MZ244023.1, MZ244020.1, ... | 98%        | 95.47% - 99.59% |
|      |          |             |                          | Rhizocarpon sp. (2)                | KP314309.1, OM065444.1                  | 98% - 99%  | 95.71% - 95.74% |
|      |          |             |                          | Rhizocarpon saanaense (2)          | MZ188989.1, MZ188988.1                  | 99%        | 95.55%          |
|      |          |             |                          | Rhizocarpon geographicum (38)      | DQ534482.1, KC740079.1, KC740059.1, ... | 99% - 100% | 95.05% - 100%   |

|        |          |                    |                      |                                     |                                          |            |                 |
|--------|----------|--------------------|----------------------|-------------------------------------|------------------------------------------|------------|-----------------|
|        |          |                    |                      | Rhizocarpon nidificum (1)           | DQ534483.2                               | 100%       | 100%            |
|        |          |                    |                      | Rhizocarpon aff. geographicum (21)  | MZ244025.1, MZ244023.1, MZ244020.1, ...  | 99% - 100% | 95.08% - 99.48% |
|        |          |                    |                      | Rhizocarpon sp. (2)                 | KP314309.1, OM065444.1                   | 100%       | 95.14% - 95.36% |
|        |          |                    |                      | Rhizocarpon saanaense (2)           | MZ188989.1, MZ188988.1                   | 100%       | 95.09%          |
| VI-b   | 51A6     | Rhizocarpon        | Rhizocarpon sp.      | Rhizocarpon effiguratum (1)         | KC740024.1                               | 99%        | 88.58%          |
|        |          |                    |                      | Rhizocarpon dispersum (2)           | KC740033.1, KC740032.1                   | 100%       | 88.24% - 88.40% |
|        |          |                    |                      | Rhizocarpon norvegicum (2)          | KY680775.1, KY680776.1                   | 99% - 100% | 86.97% - 88.33% |
|        |          |                    |                      | Rhizocarpon alpicola (2)            | KC740020.1, KC740019.1                   | 98% - 99%  | 88.04% - 88.25% |
|        |          |                    |                      | Rhizocarpon geographicum (80)       | KC740173.1, KC757483.1, KC740097.1, ...  | 95% - 100% | 85.11% - 87.76% |
|        |          |                    |                      | Rhizocarpon atroflavescens (4)      | MK629881.1, MK625448.1, KY680777.1, ...  | 97% - 100% | 86.84% - 87.48% |
|        |          |                    |                      | Rhizocarpon pusillum (1)            | KC740025.1                               | 97%        | 86.79%          |
|        |          |                    |                      | Rhizocarpon furax (1)               | MT108257.1                               | 100%       | 86.40%          |
|        |          |                    |                      | Rhizocarpon copelandii (3)          | KU687456.1, KU687455.1, KU687447.1       | 97%        | 86.19%          |
|        |          |                    |                      | Rhizocarpon jemtlandicum (3)        | KU687460.1, KU687446.1, KU687445.1       | 97%        | 85.90% - 86.09% |
|        |          |                    |                      | Rhizocarpon geminatum var. citrinum | OK333016.1                               | 100%       | 85.41%          |
|        |          |                    |                      |                                     |                                          |            |                 |
| VII-a  | 58A1_Bot | Psoroma hypnori    | Psoroma hypnorum     | Psoroma hypnorum (14)               | GQ927297.1, MK811764.1, MZ159608.1, ...  | 94% - 100% | 96.09% - 100%   |
|        |          |                    |                      | Psoroma cf. hypnorum (1)            | MN483079.1                               | 99%        | 98.34%          |
|        |          |                    |                      | Uncultured fungus (1)               | KC965717.1                               | 100%       | 97.33%          |
| VII-a  | 60A1     | Psoroma hypnori    | Psoroma hypnorum     | Psoroma hypnorum (14)               | GQ927297.1, MK811764.1, MZ159608.1, ...  | 94% - 100% | 95.88% - 99.79% |
|        |          |                    |                      | Psoroma cf. hypnorum (1)            | MN483079.1                               | 99%        | 98.14%          |
|        |          |                    |                      | Uncultured fungus (1)               | KC965717.1                               | 100%       | 97.13%          |
| VII-b  | 72A2_S   | Psoroma            | Psoroma hypnorum     | Psoroma hypnorum (4)                | MH802363.1, MZ159608.1, KY266971.1, ...  | 87%        | 93.64% - 94.54% |
|        |          |                    |                      | Psoroma cf. hypnorum (1)            | MN483079.1                               | 87%        | 94.17%          |
|        |          |                    |                      | uncultured fungus (3)               | KC965717.1, KC965712.1, KC966165.1       | 86% - 99%  | 84.1% - 93.44%  |
|        |          |                    |                      | Psoroma cinnamomeum (2)             | GQ927293.1, GQ927292.1                   | 98% - 99%  | 84.52% - 84.75% |
|        |          |                    |                      | Psoroma tenue (2)                   | GQ927291.1, GQ927290.1                   | 98%        | 84.20%          |
|        |          |                    |                      | Lecanoromycetidae sp. TS-2019a (1)  | MN483146.1                               | 89%        | 83.73%          |
|        |          |                    |                      | Psoroma paleaceum (1)               | GQ927305.1                               | 95%        | 83.25%          |
| VIII-a | 48F1_Sup | Lecanora polytro   | Lecanora polytropa   | Lecanora polytropa (1)              | DQ534470.2                               | 100%       | 99.67%          |
| VIII-b | 49G      | Lecanora           | Lecanora sp. s.lat.  | Lecanora cf. polytropa (169)        | ON180214.1, ON180212.1, ON180059.1, ...  | 90% - 93%  | 95.86% - 98.71% |
|        |          |                    |                      | Lecanora polytropa (38)             | KP314358.1, MZ243613.1, KP314458.1, ...  | 91% - 99%  | 96.11% - 98.32% |
|        |          |                    |                      | Lecanora fuscobrunnea (8)           | GU170839.1, MK970661.1, JN873872.2, ...  | 89% - 100% | 97.35% - 97.87% |
|        |          |                    |                      | Rhizoplaca sp. (1)                  | JX036118.1                               | 92%        | 97.42%          |
|        |          |                    |                      | Lecanora intricata (3)              | OL603995.1, OL604031.1, AY398703.1       | 88% - 100% | 96.44% - 97.33% |
|        |          |                    |                      | Lecanora chlorophaeodes (1)         | AY398704.1                               | 100%       | 96.70%          |
|        |          |                    |                      | Rhizoplaca aspidophora (1)          | DQ534484.2                               | 100%       | 97.16%          |
|        |          |                    |                      | Rhizoplaca aspidophora (1)          | DQ534484.2                               | 100%       | 100%            |
|        |          |                    |                      | Rhizoplaca sp. (1)                  | JX036118.1                               | 100%       | 99.10%          |
|        |          |                    |                      | Lecanora fuscobrunnea (13)          | MK970661.1, JN873872.2, GU170839.1, ...  | 88% - 100% | 98.59% - 99.10% |
|        |          |                    |                      | Lecanora cf. polytropa (135)        | ON180226.1, ON179998.1, ON180108.1, ...  | 98%        | 95.41% - 98.63% |
| VIII-b | 49B      | Lecanora           | Lecanora sp. s.lat.  | Lecanora polytropa (39)             | HQ650643.1, KP314321.1, MZ243599.1, ...  | 97% - 100% | 95% - 98.42%    |
|        |          |                    |                      | Lecanora intricata (3)              | OL604031.1, OL603995.1, OL603994.1       | 86% - 100% | 96.40% - 97.29% |
|        |          |                    |                      | Lecanora cf. Intricata (1)          | ON179989.1                               | 98%        | 95.22%          |
|        |          |                    |                      | Lecanora chlorophaeodes (2)         | AY398704.1, AF070029.1                   | 97%        | 95.15%          |
|        |          |                    |                      |                                     |                                          |            |                 |
|        |          |                    |                      |                                     |                                          |            |                 |
|        |          |                    |                      |                                     |                                          |            |                 |
|        |          |                    |                      |                                     |                                          |            |                 |
|        |          |                    |                      |                                     |                                          |            |                 |
|        |          |                    |                      |                                     |                                          |            |                 |
|        |          |                    |                      |                                     |                                          |            |                 |
| IX     | 18F      | Lecidella carpathi | Lecidella carpathica | Lecidella carpathica (2)            | DQ534471.2, MT139649.1                   | 100%       | 97.45% - 99.87% |
|        |          |                    |                      | Sarcogyne sp. (1)                   | ON794211.1                               | 95%        | 96.78%          |
|        |          |                    |                      | Lecidella stigmathea (3)            | MT139650.1, MT139653.1, MZ159382.1       | 98% - 100% | 96.13% - 96.65% |
|        |          |                    |                      | Lecidella greenii (10)              | NR_137582.2, JX036151.1, JX036150.1, ... | 81% - 100% | 95.01% - 95.4%  |
|        |          |                    |                      | Lecidella patavina (1)              | MT273115.1                               | 100%       | 95.03%          |
|        |          |                    |                      | Lecidea sp. (1)                     | AY667581.1                               | 100%       | 95.03%          |
| IX     | 73A_Sup  | Lecidella carpathi | Lecidella carpathica | Lecidella carpathica (2)            | DQ534471.2, MT139649.1                   | 100%       | 97.34% - 99.73% |
|        |          |                    |                      | Sarcogyne sp. (1)                   | ON794211.1                               | 94%        | 96.64%          |
|        |          |                    |                      | Lecidella stigmathea (3)            | MT139650.1, MZ159382.1, MT139653.1       | 99% - 100% | 96.01% - 96.54% |
|        |          |                    |                      | Lecidella greenii (8)               | NR_137582.2, JX036151.1, JX036150.1, ... | 81% - 100% | 95.05% - 95.96% |
|        |          |                    |                      |                                     |                                          |            |                 |
| X      | 24B      | Candelariella flav | Candelariella flava  | Candelariella flava (3)             | MZ919298.1, MZ919299.1, MZ919301.1       | 98% - 100% | 96.79% - 99.12% |
| X      | 24D      | Candelariella flav | Candelariella flava  | Candelariella flava (3)             | MZ919298.1, MZ919299.1, MZ919301.1       | 98% - 100% | 97.05% - 99.45% |
| XI     | 72A3     | Steinera           | Steinera intricata   | Steinera intricata (10)             | MH717151.1, MF893082.1, OP324617.1, ...  | 96% - 100% | 95.71% - 100%   |
|        |          |                    |                      | Steinera isidiata (4)               | MF893086.1, NR_152550.1, MF893087.1, ... | 96%        | 95.71% - 95.92% |
|        |          |                    |                      | Steinera subantarctica (1)          | MF893108.1                               | 96%        | 95.09%          |
|        |          |                    |                      |                                     |                                          |            |                 |
| XI     | 69A2_Bot | Steinera           | Steinera intricata   | Steinera intricata (10)             | MH717151.1, MF893082.1, OP324617.1, ...  | 87% - 98%  | 95.61% - 100%   |
|        |          |                    |                      | Steinera isidiata (4)               | MF893086.1, NR_152550.1, MF893087.1, ... | 87%        | 95.61% - 95.82% |
|        |          |                    |                      | Steinera subantarctica (1)          | MF893108.1                               | 87%        | 95%             |
| XI     | 30A2     | Steinera           | Steinera intricata   | Steinera intricata (10)             | MH717151.1, MF893082.1, OP324617.1, ...  | 92% - 100% | 96.57% - 99.77% |
|        |          |                    |                      | Steinera isidiata (4)               | MF893086.1, NR_152550.1, MF893087.1, ... | 92%        | 97.02% - 97.25% |
|        |          |                    |                      | Steinera subantarctica (1)          | MF893108.1                               | 92%        | 96.80%          |
|        |          |                    |                      | Steinera latipora (1)               | MF893088.1                               | 80%        | 95.54%          |
|        |          |                    |                      | Steinera pannarioides (1)           | NR_152553.1                              | 80%        | 95.50%          |
|        |          |                    |                      | Steinera sp. (1)                    | MK571785.1                               | 92%        | 95.21%          |
|        |          |                    |                      |                                     |                                          |            |                 |
| XI     | 68A4     | Steinera           | Steinera intricata   | Steinera intricata (10)             | MH717160.1, MF893082.1, OP324617.1, ...  | 99% - 100% | 96.88% - 100%   |
|        |          |                    |                      | Steinera subantarctica (1)          | MF893108.1                               | 99%        | 97.73%          |
|        |          |                    |                      | Steinera isidiata (5)               | MF893086.1, NR_152550.1, MF893087.1, ... | 99%        | 95.18% - 97.45% |
|        |          |                    |                      | Steinera latipora (1)               | MF893088.1                               | 98%        | 95.76%          |
|        |          |                    |                      | Steinera pannarioides (4)           | MF893107.1, MF893106.1, NR_152553.1, ... | 98%        | 95.74%          |
|        |          |                    |                      | Steinera sp. (2)                    | MK571784.1, MK571785.1                   | 99%        | 96.32% - 96.34% |
|        |          |                    |                      | Steinera lebouvieri (3)             | NR_152551.1, MF893090.1, MF893089.1      | 98%        | 96.31%          |
| XI     | 75A2     | Steinera           | Steinera intricata   | Steinera intricata (10)             | MH717153.1, MF893082.1, OP324617.1, ...  | 99% - 100% | 96.74% - 100%   |
|        |          |                    |                      | Steinera isidiata (5)               | MF893086.1, NR_152550.1, MF893087.1, ... | 99%        | 95.90% - 98.09% |
|        |          |                    |                      | Steinera subantarctica (1)          | MF893108.1                               | 99%        | 97.55%          |
|        |          |                    |                      | Steinera latipora (1)               | MF893088.1                               | 99%        | 95.90%          |
|        |          |                    |                      | Steinera pannarioides (4)           | MF893107.1, MF893106.1, NR_152553.1, ... | 99%        | 95.90%          |
|        |          |                    |                      | Steinera lebouvieri (3)             | NR_152551.1, MF893090.1, MF893089.1      | 98%        | 96.14% - 96.69% |
|        |          |                    |                      | Steinera sp. (2)                    | MK571784.1, MK571785.1                   | 97% - 98%  | 96.42% - 96.43% |
|        |          |                    |                      |                                     |                                          |            |                 |
| XI     | 68A3_Bot | Steinera           | Steinera intricata   | Steinera intricata (10)             | MH717153.1, MF893082.1, OP324617.1, ...  | 99% - 100% | 97.17% - 100%   |
|        |          |                    |                      | Steinera subantarctica (1)          | MF893108.1                               | 99%        | 98.30%          |
|        |          |                    |                      | Steinera isidiata (5)               | MF893086.1, NR_152550.1, MF893087.1, ... | 99%        | 95.74% - 98.01% |
|        |          |                    |                      | Steinera lebouvieri (3)             | NR_152551.1, MF893090.1, MF893089.1      | 98%        | 96.87%          |
|        |          |                    |                      | Steinera sp. (2)                    | MK571784.1, MK571785.1                   | 99%        | 96.32% - 96.34% |
|        |          |                    |                      | Steinera pannarioides (4)           | MF893107.1, MF893106.1, NR_152553.1, ... | 98%        | 96.30%          |
|        |          |                    |                      | Steinera latipora (1)               | MF893088.1                               | 98%        | 96.05%          |
| XI     | 72A2_Bot | Steinera           | Steinera intricata   | Steinera intricata (10)             | MH717160.1, MF893082.1, OP324617.1, ...  | 100%       | 97.08% - 100%   |
|        |          |                    |                      | Steinera subantarctica (1)          | MF893108.1                               | 99%        | 97.95%          |
|        |          |                    |                      | Steinera isidiata (5)               | MF893086.1, NR_152550.1, MF893087.1, ... | 100%       | 95.34% - 97.67% |
|        |          |                    |                      | Steinera sp. (2)                    | MK571784.1, MK571785.1                   | 100%       | 96.21% - 96.23% |
|        |          |                    |                      | Steinera pannarioides (4)           | MF893107.1, MF893106.1, NR_152553.1, ... | 100%       | 96.21%          |
|        |          |                    |                      | Steinera lebouvieri (3)             | NR_152551.1, MF893090.1, MF893089.1      | 100%       | 96.21%          |
|        |          |                    |                      | Steinera latipora (1)               | MF893088.1                               | 100%       | 96.21%          |
|        |          |                    |                      |                                     |                                          |            |                 |
| XII    | 69A3_Bot | Lepraria           | Lepraria sp.         | Lepraria elobata (14)               | AF517909.1, JQ070298.1, MG554669.1, ...  | 88% - 100% | 95.71% - 97.46% |
|        |          |                    |                      | Lepraria cf. caesioalba (3)         | AF517894.1, AF517905.1, AF517919.1       | 96%        | 95.77% - 97.45% |
|        |          |                    |                      | Lepraria caesioalba (8)             | AF517901.1, EU008610.1, MZ244060.1, ...  | 90% - 100% | 96.52% - 97.44% |
|        |          |                    |                      | Lepraria granulata (1)              | DQ914539.1                               | 100%       | 97.35%          |

|        |      |                                    |                    |                                 |                                         |            |                 |
|--------|------|------------------------------------|--------------------|---------------------------------|-----------------------------------------|------------|-----------------|
|        |      |                                    |                    | Lepraria neglecta (33)          | KC209139.1, KC209159.1, KC209164.1, ... | 96% - 100% | 95.09% - 97.34% |
|        |      |                                    |                    | Lepraria sp. (6)                | DQ914543.1, EU008630.1, OL625386.1, ... | 93% - 100% | 95.11% - 96.94% |
|        |      |                                    |                    | Uncultured fungus (1)           | KC965398.1                              | 100%       | 96.72%          |
|        |      |                                    |                    | Lepraria membranacea (1)        | DQ534473.2                              | 100%       | 96.52%          |
|        |      |                                    |                    | Lepraria cacuminum (1)          | AF517888.1                              | 96%        | 96.19%          |
|        |      |                                    |                    | Lepraria atlantica (4)          | EF619550.1, EF619549.1, AF517887.1, ... | 96% - 100% | 95.56% - 95.92% |
|        |      |                                    |                    | Lepraria humida (9)             | EF619551.1, DQ401101.1, KC209155.1, ... | 87% - 100% | 95.3% - 95.91%  |
|        |      |                                    |                    | Lepraria borealis (1)           | AF517908.1                              | 96%        | 95.76%          |
|        |      |                                    |                    | Lepraria jackii (3)             | MG554672.1, KF682451.1, KF682450.1      | 93% - 100% | 95.11% - 95.64% |
| XIII-a | 14A  | Stereocaulon                       | Stereocaulon sp. 1 | Stereocaulon alpinum (158)      | EU161238.1, DQ534486.2, MK812253.1, ... | 90% - 100% | 95.46% - 100%   |
|        |      |                                    |                    | Stereocaulon sp. (135)          | MH415129.1, MN596951.1, MH415121.1, ... | 81% - 100% | 95% - 100%      |
|        |      |                                    |                    | Stereocaulon grande (1)         | MK812157.1                              | 96%        | 99.32%          |
|        |      |                                    |                    | Stereocaulon saxatile (6)       | DQ396927.1, DQ396928.1, DQ396926.1, ... | 99%        | 96.10% - 99.13% |
|        |      |                                    |                    | Stereocaulon tomentosum (9)     | EU008634.1, DQ001301.1, KP314447.1, ... | 99% - 100% | 96.52% - 97.60% |
|        |      |                                    |                    | Stereocaulon paschale (3)       | DQ396897.1, HQ650690.1, DQ396924.1      | 99% - 100% | 96.54% - 97.40% |
|        |      |                                    |                    | Stereocaulon intermedium (7)    | DQ396938.1, KP348010.1, KF928152.1, ... | 99% - 100% | 95.88% - 97.40% |
|        |      |                                    |                    | uncultured Stereocaulaceae (1)  | FJ552738.1                              | 100%       | 97.40%          |
|        |      |                                    |                    | Stereocaulon sasakii (2)        | DQ396958.1, DQ396957.1                  | 99%        | 96.75% - 97.18% |
|        |      |                                    |                    | Stereocaulon myriocarpum (3)    | DQ396954.1, DQ396932.1, DQ396931.1      | 99%        | 96.96% - 97.39% |
|        |      |                                    |                    | Stereocaulon alpestre (1)       | DQ396893.1                              | 99%        | 96.96%          |
|        |      |                                    |                    | Stereocaulon botryosum (4)      | DQ396952.1, KP314386.1, EU008632.1, ... | 99% - 100% | 96.73% - 96.96% |
|        |      |                                    |                    | Stereocaulon condensatum (2)    | ON228407.1, MT512646.1                  | 100%       | 96.32% - 96.96% |
|        |      |                                    |                    | Stereocaulon subcoralloides (2) | EU008633.1, DQ396896.1                  | 99%        | 96.75% - 96.95% |
|        |      |                                    |                    | Stereocaulon evolutum (2)       | DQ396922.1, MZ159744.1                  | 99% - 100% | 96.54% - 96.74% |
|        |      |                                    |                    | Stereocaulon glabrum (7)        | DQ396910.1, DQ396902.1, DQ396901.1, ... | 96% - 99%  | 95.22% - 96.52% |
|        |      |                                    |                    | Stereocaulon verruculigerum     | DQ396968.1                              | 83%        | 96.38%          |
|        |      |                                    |                    | Stereocaulon taeniarum (1)      | DQ396919.1                              | 99%        | 96.32%          |
|        |      |                                    |                    | Stereocaulon rivulorum (4)      | MK812658.1, DQ396967.1, AF517928.1, ... | 99% - 100% | 96.08% - 96.31% |
|        |      |                                    |                    | Stereocaulon farinaceum (1)     | DQ396973.1                              | 99%        | 96.30%          |
|        |      |                                    |                    | Stereocaulon apocalypticum (1)  | LC516206.1                              | 100%       | 96.10%          |
|        |      |                                    |                    | Stereocaulon curtatum (1)       | DQ396949.1                              | 99%        | 95.87%          |
|        |      |                                    |                    | Stereocaulon exutum (1)         | KP324744.1                              | 99%        | 95.87%          |
|        |      |                                    |                    | Stereocaulon glareosum (1)      | DQ396974.1                              | 99%        | 95.67%          |
|        |      |                                    |                    | Stereocaulon nanodes (1)        | DQ396970.1                              | 99%        | 95.65%          |
|        |      |                                    |                    | Stereocaulon pileatum (4)       | OL625595.1, AF517927.1, MK812510.1, ... | 84% - 85%  | 95.2% - 95.45%  |
|        |      |                                    |                    | Stereocaulon vesuvianum (1)     | OL625606.1                              | 81%        | 95.26%          |
|        |      |                                    |                    | Stereocaulon verruciferum (1)   | DQ396899.1                              | 85%        | 95.17%          |
|        |      |                                    |                    | Stereocaulon depreautii (1)     | DQ396947.1                              | 99%        | 95.02%          |
| XIII-a | 1B   | Stereocaulon                       | Stereocaulon sp. 1 | Stereocaulon alpinum (154)      | DQ396915.1, EU161238.1, MK812253.1, ... | 83% - 100% | 95.11% - 100%   |
|        |      |                                    |                    | Stereocaulon sp. (114)          | MN839754.1, MN839753.1, MH415129.1, ... | 80% - 100% | 95.04% - 100%   |
|        |      |                                    |                    | Stereocaulon saxatile (6)       | DQ396927.1, DQ396928.1, DQ396926.1, ... | 89%        | 96.37% - 99.09% |
|        |      |                                    |                    | Stereocaulon paschale (3)       | DQ396897.1, HQ650690.1, DQ396924.1      | 89% - 98%  | 96.73% - 97.28% |
|        |      |                                    |                    | uncultured Stereocaulaceae (1)  | FJ552738.1                              | 98%        | 97.19%          |
|        |      |                                    |                    | Stereocaulon tomentosum (9)     | DQ396894.1, EU008634.1, KP314447.1, ... | 87% - 99%  | 95.45% - 97.09% |
|        |      |                                    |                    | Stereocaulon subcoralloides (2) | EU008633.1, DQ396896.1                  | 87% - 89%  | 96.91% - 97.01% |
|        |      |                                    |                    | Stereocaulon botryosum (4)      | EU008632.1, KP314389.1, DQ396952.1      | 86% - 96%  | 96.54% - 96.81% |
|        |      |                                    |                    | Stereocaulon sasakii (2)        | DQ396958.1, DQ396957.1                  | 89%        | 96.18% - 96.55% |
|        |      |                                    |                    | Stereocaulon taeniarum (1)      | DQ396919.1                              | 89%        | 96.55%          |
|        |      |                                    |                    | Stereocaulon myriocarpum (3)    | DQ396954.1, DQ396932.1, DQ396931.1      | 89%        | 96.36% - 96.54% |
|        |      |                                    |                    | Stereocaulon condensatum (2)    | ON228407.1, MT512646.1                  | 97% - 98%  | 96.36% - 96.49% |
|        |      |                                    |                    | Stereocaulon alpestre (1)       | DQ396893.1                              | 89%        | 96.36%          |
|        |      |                                    |                    | Stereocaulon intermedium (7)    | DQ396938.1, KP348010.1, KF928152.1, ... | 89% - 96%  | 95.77% - 96.36% |
|        |      |                                    |                    | Stereocaulon glabrum (7)        | DQ396910.1, DQ396902.1, DQ396901.1, ... | 86% - 89%  | 95.26% - 96.36% |
|        |      |                                    |                    | Stereocaulon evolutum (2)       | MZ159744.1, DQ396922.1                  | 89% - 98%  | 96.36%          |
|        |      |                                    |                    | Stereocaulon rivulorum (4)      | MK812658.1, DQ396967.1, AF517928.1, ... | 84% - 97%  | 95.8% - 96.31%  |
|        |      |                                    |                    | Stereocaulon farinaceum (1)     | DQ396973.1                              | 89%        | 96.17%          |
|        |      |                                    |                    | Stereocaulon apocalypticum (1)  | LC516206.1                              | 99%        | 96.08%          |
|        |      |                                    |                    | Stereocaulon nanodes (1)        | DQ396970.1                              | 89%        | 95.99%          |
|        |      |                                    |                    | Stereocaulon exutum (1)         | KP324744.1                              | 92%        | 95.76%          |
|        |      |                                    |                    | Stereocaulon glareosum (1)      | DQ396974.1                              | 86%        | 95.31%          |
|        |      |                                    |                    | Stereocaulon symphycheilum (3)  | MK812328.1, MK812189.1, MK811941.1      | 97%        | 95.15%          |
| XIII-b | 28B  | Stereocaulon                       | Stereocaulon sp. 2 | Stereocaulon glabrum (7)        | DQ396901.1, DQ396902.1, DQ396911.1, ... | 95% - 98%  | 97.08% - 99.45% |
|        |      |                                    |                    | Stereocaulon sp. (66)           | MH414985.1, MH415062.1, MN839743.1, ... | 85% - 100% | 95.04% - 98.75% |
|        |      |                                    |                    | Stereocaulon subcoralloides (2) | EU008633.1, DQ396896.1                  | 95% - 98%  | 96.17% - 96.44% |
|        |      |                                    |                    | Stereocaulon saxatile (5)       | DQ396926.1, DQ396918.1, DQ396927.1, ... | 98%        | 95.08% - 96.36% |
|        |      |                                    |                    | Stereocaulon botryosum (3)      | EU008632.1, KP314389.1, DQ396952.1      | 95% - 99%  | 95.06% - 96.05% |
|        |      |                                    |                    | Stereocaulon paschale (3)       | DQ396897.1, HQ650690.1, DQ396924.1      | 98% - 100% | 95.08% - 95.82% |
|        |      |                                    |                    | Stereocaulon evolutum (1)       | DQ396922.1                              | 98%        | 95.80%          |
|        |      |                                    |                    | Stereocaulon intermedium (2)    | DQ396934.1, DQ396938.1                  | 98%        | 95.44% - 95.62% |
|        |      |                                    |                    | Stereocaulon alpinum (9)        | EU161238.1, DQ534486.2, MK812253.1, ... | 80% - 100% | 95.13% - 95.53% |
|        |      |                                    |                    | Stereocaulon myriocarpum (2)    | DQ396932.1, DQ396954.1                  | 98%        | 95.07% - 95.26% |
|        |      |                                    |                    | Stereocaulon nanodes (1)        | DQ396970.1                              | 96%        | 95.16%          |
|        |      |                                    |                    | Stereocaulon tomentosum (2)     | DQ001301.1, DQ396894.1                  | 98% - 100% | 95.06% - 95.34% |
|        |      |                                    |                    | uncultured Stereocaulaceae (1)  | FJ552738.1                              | 100%       | 95.15%          |
| XIII-b | 91A  | Stereocaulon                       | Stereocaulon sp. 2 | Stereocaulon glabrum (7)        | DQ396902.1, DQ396911.1, DQ396909.1, ... | 100%       | 97.62% - 100%   |
|        |      |                                    |                    | Stereocaulon sp. (80)           | MH414985.1, MH415062.1, MN839750.1, ... | 94% - 100% | 95.01% - 99.78% |
|        |      |                                    |                    | Stereocaulon paschale (3)       | DQ396897.1, HQ650690.1, DQ396924.1      | 100%       | 96.11% - 96.54% |
|        |      |                                    |                    | Stereocaulon saxatile (6)       | DQ396926.1, DQ396918.1, DQ396923.1, ... | 100%       | 95.90% - 96.54% |
|        |      |                                    |                    | Stereocaulon grande (1)         | MK812157.1                              | 85%        | 96.45%          |
|        |      |                                    |                    | Stereocaulon subcoralloides (2) | EU008633.1, DQ396896.1                  | 100%       | 96.33%          |
|        |      |                                    |                    | Stereocaulon alpinum (128)      | DQ396900.1, EU161238.1, MT076377.1, ... | 85% - 100% | 95.01% - 96.32% |
|        |      |                                    |                    | Stereocaulon intermedium (2)    | DQ396938.1, DQ396934.1                  | 100%       | 96.10%          |
|        |      |                                    |                    | Stereocaulon botryosum (2)      | EU008632.1, KP314386.1                  | 100%       | 95.01% - 95.90% |
|        |      |                                    |                    | Stereocaulon taeniarum (1)      | DQ396919.1                              | 100%       | 95.90%          |
|        |      |                                    |                    | Stereocaulon evolutum (1)       | DQ396922.1                              | 100%       | 95.67%          |
|        |      |                                    |                    | Stereocaulon myriocarpum (3)    | DQ396932.1, DQ396954.1, DQ396931.1      | 100%       | 95.24% - 95.67% |
|        |      |                                    |                    | Stereocaulon tomentosum (5)     | DQ001301.1, EU008634.1, DQ396908.1, ... | 100%       | 95.01% - 95.67% |
|        |      |                                    |                    | Stereocaulon sasakii (2)        | DQ396957.1, DQ396958.1                  | 100%       | 95.02% - 95.24% |
|        |      |                                    |                    | Stereocaulon apocalypticum (1)  | LC516206.1                              | 100%       | 95.03%          |
| XIV    | 94A2 | Lecanoromycete: Myriospora sp.     |                    | Stereocaulon alpestre (1)       | DQ396893.1                              | 100%       | 95.03%          |
|        |      |                                    |                    | uncultured Stereocaulaceae (1)  | FJ552738.1                              | 100%       | 95.01%          |
|        |      |                                    |                    | Myriospora signyensis (4)       | MF074120.1, MF074119.1, MF074121.1, ... | 99%        | 95.33% - 99.80% |
|        |      |                                    |                    | Lecanoromycetes sp. (2)         | MH349730.1, MH071786.1                  | 90% - 96%  | 99.37% - 99.55% |
|        |      |                                    |                    | Myriospora smaragdula (15)      | EU870663.1, EU870664.1, DQ374141.1, ... | 98%        | 95.19% - 96.72% |
|        |      |                                    |                    | Myriospora scabrida (10)        | MZ262724.1, MF074118.1, DQ525526.1, ... | 90% - 100% | 95.51% - 96.44% |
|        |      |                                    |                    | Myriospora sp. (2)              | MZ262716.1, OP162400.1                  | 95% - 100% | 95.96% - 96.41% |
|        |      |                                    |                    | Myriospora rhagadiza (1)        | MF095738.1                              | 100%       | 96.16%          |
|        |      |                                    |                    | Myriospora myochroa (1)         | MF095737.1                              | 100%       | 95.56%          |
|        |      |                                    |                    | Myriospora hassei (1)           | MW715698.1                              | 86%        | 95.35%          |
| XV     | 110A | Lecidea / Sarcogy Lecidea sp. s.l. |                    | Lecidea sp. (24)                | MK970676.1, EU263928.1, MZ243696.1, ... | 94% - 99%  | 85.43% - 87.33% |
|        |      |                                    |                    | Lecidea polypynidophora (17)    | MH231446.1, MT273102.1, EU257682.1, ... | 98% - 99%  | 86.34% - 87.15% |

|        |      |                                        |                                        |                                         |            |                 |
|--------|------|----------------------------------------|----------------------------------------|-----------------------------------------|------------|-----------------|
|        |      |                                        | Lecidea aff. laboriosa (5)             | MK990116.1, MK990124.1, MK990115.1, ... | 94% - 99%  | 86.14% - 87.03% |
|        |      |                                        | Lecidea perlatolicea (2)               | MK595453.1, MZ243725.1                  | 99%        | 85.15% - 86.65% |
|        |      |                                        | Lecidea andersonii (21)                | MK620084.1, GU074446.1, MZ243679.1, ... | 94% - 99%  | 85.14% - 86.64% |
|        |      |                                        | Lecidea aff. polypycnidophora (1)      | MK990117.1                              | 99%        | 86.56%          |
|        |      |                                        | Lecidea promiscens (1)                 | MK595687.1                              | 99%        | 86.53%          |
|        |      |                                        | Lecidea laboriosa (7)                  | EU259902.1, MZ243714.1, MW443062.1, ... | 98% - 99%  | 85.54% - 86.51% |
|        |      |                                        | Lecidea cf. polypycnidophora (1)       | MK620081.1                              | 97%        | 86.44%          |
|        |      |                                        | Lecidea aff. andersonii (3)            | MK990111.1, MK990109.1, MK990110.1      | 93% - 100% | 85.74% - 86.41% |
|        |      |                                        | Sarcogyne sp. (1)                      | OP162364.1                              | 99%        | 86.36%          |
|        |      |                                        | Lecidea cancriformis (3)               | AY667582.1, MK970678.1, MK970677.1      | 99%        | 85.07% - 86.17% |
|        |      |                                        | Lecidea hassei (1)                     | ON707103.1                              | 98%        | 86.17%          |
|        |      |                                        | Lecidea violascens (1)                 | MZ922140.1                              | 98%        | 85.80%          |
|        |      |                                        | Lecidea atrobrunnea (6)                | GU074457.1, MT273109.1, MW443068.1, ... | 98% - 99%  | 84.95% - 85.31% |
|        |      |                                        | Lecidea confluens (1)                  | EU263921.1                              | 99%        | 85.18%          |
|        |      |                                        | Lecidea syncarpa (3)                   | MZ243739.1, MK990107.1, KF570277.1      | 98% - 99%  | 84.58% - 85.08% |
|        |      |                                        | Lecidea leucothallina (2)              | MG968258.1, MG968256.1                  | 99%        | 84.86%          |
| XV     | 111A | Lecidea / Sarcogyne                    | Lecidea sp. (24)                       | MK970676.1, EU263928.1, MZ243696.1, ... | 94% - 100% | 85.43% - 87.33% |
|        |      |                                        | Lecidea polypycnidophora (17)          | MH231446.1, MT273102.1, EU257682.1, ... | 98% - 99%  | 86.34% - 87.15% |
|        |      |                                        | Lecidea aff. laboriosa (5)             | MK990116.1, MK990124.1, MK990115.1, ... | 94% - 99%  | 86.14% - 87.03% |
|        |      |                                        | Lecidea perlatolicea (2)               | MK595453.1, MZ243725.1                  | 99% - 100% | 85.04% - 86.65% |
|        |      |                                        | Lecidea andersonii (21)                | MK620084.1, GU074446.1, MZ243679.1, ... | 94% - 99%  | 85.14% - 86.64% |
|        |      |                                        | Lecidea aff. polypycnidophora (1)      | MK990117.1                              | 99%        | 86.56%          |
|        |      |                                        | Lecidea promiscens (1)                 | MK595687.1                              | 99%        | 86.53%          |
|        |      |                                        | Lecidea laboriosa (7)                  | EU259902.1, MZ243714.1, MW443062.1, ... | 97% - 99%  | 85.54% - 86.51% |
|        |      |                                        | Lecidea cf. polypycnidophora (1)       | MK620081.1                              | 97%        | 86.44%          |
|        |      |                                        | Lecidea aff. andersonii (3)            | MK990111.1, MK990109.1, MK990110.1      | 92% - 100% | 85.74% - 86.41% |
|        |      |                                        | Sarcogyne sp. (1)                      | OP162364.1                              | 99%        | 86.36%          |
|        |      |                                        | Lecidea cancriformis (3)               | AY667582.1, MK970678.1, MK970677.1      | 99%        | 85.07% - 86.17% |
|        |      |                                        | Lecidea hassei (1)                     | ON707103.1                              | 98%        | 86.17%          |
|        |      |                                        | Lecidea violascens (1)                 | MZ922140.1                              | 98%        | 85.80%          |
|        |      |                                        | Lecidea atrobrunnea (6)                | GU074457.1, MT273109.1, MW443068.1, ... | 98% - 100% | 84.95% - 85.20% |
|        |      |                                        | Lecidea confluens (1)                  | EU263921.1                              | 99%        | 85.18%          |
|        |      |                                        | Lecidea syncarpa (3)                   | MZ243739.1, MK990107.1, KF570277.1      | 97% - 100% | 84.48% - 85.08% |
|        |      |                                        | Lecidea leucothallina (2)              | MG968258.1, MG968256.1                  | 98%        | 84.86%          |
| XVI    | 24C  | Caliciaceae / Phyc. Buellia sp. s.lat. | Buellia frigida (14)                   | AY667583.1, AF281307.1, JX036142.1, ... | 87% - 100% | 87.38% - 88.18% |
|        |      |                                        | Buellia sp. (5)                        | MK970688.1, JX036043.1, MN615683.1, ... | 94% - 100% | 81.87% - 87.79% |
|        |      |                                        | Amandinea petermannii (1)              | AF250779.1                              | 98%        | 87.55%          |
|        |      |                                        | Buellia russa (1)                      | DQ534454.2                              | 100%       | 87.02%          |
|        |      |                                        | Buellia aethalea (2)                   | AF540496.1, AY143410.1                  | 97% - 98%  | 86.14% - 87.01% |
|        |      |                                        | Physciaceae sp. (1)                    | JF794067.1                              | 99%        | 86.91%          |
|        |      |                                        | Buellia ocellata (2)                   | AF540502.1, OK332942.1                  | 98% - 100% | 85.11% - 86.36% |
|        |      |                                        | Dimelaena oreina (14)                  | ON447572.1, OK569798.1, AI421417.1, ... | 84% - 100% | 82.18% - 85.45% |
|        |      |                                        | Buellia sandstedei (3)                 | OL396606.1, OK332944.1, OK332945.1      | 90% - 100% | 83.52% - 85.11% |
|        |      |                                        | Rinodina sp. (1)                       | ON707084.1                              | 99%        | 85.08%          |
|        |      |                                        | Amandinea punctata (7)                 | OL467351.1, HQ650627.1, EU681282.1, ... | 88% - 90%  | 83.19% - 84.62% |
|        |      |                                        | Dimelaena sp. (12)                     | MZ229882.1, MZ229869.1, MZ229884.1, ... | 87% - 100% | 82.01% - 84.57% |
|        |      |                                        | Amandinea coniois (1)                  | KJ607904.1                              | 89%        | 84.52%          |
|        |      |                                        | Amandinea lecideina (1)                | MZ159589.1                              | 90%        | 83.76%          |
|        |      |                                        | Buellia insignis (1)                   | OL467352.1                              | 89%        | 83.69%          |
|        |      |                                        | Buellia microcarpa (2)                 | OL396670.1, MZ968896.1                  | 99%        | 83.78%          |
|        |      |                                        | Buellia schaeeri (2)                   | MK778592.1, AF250791.1                  | 88% - 89%  | 83.37% - 83.73% |
|        |      |                                        | Calicium sp. (1)                       | DQ812126.1                              | 93%        | 83.57%          |
|        |      |                                        | Buellia polita (7)                     | MN615679.1, MN615678.1, MN615675.1, ... | 92%        | 83.26% - 83.47% |
|        |      |                                        | Buellia subnumerosa (2)                | LC153803.1, LC153802.1                  | 89%        | 83.33%          |
|        |      |                                        | Buellia boseongensis (1)               | MF398999.1                              | 88%        | 83.19%          |
|        |      |                                        | Buellia geophila (1)                   | OL467354.1                              | 89%        | 83.12%          |
|        |      |                                        | Buellia badia (4)                      | MG250192.1, MK812426.1, KX512900.1, ... | 100%       | 82.10% - 83.05% |
|        |      |                                        | Calicium glaucellum (3)                | AY450570.1, FR799141.1, DQ789082.1      | 93%        | 82.23% - 82.72% |
|        |      |                                        | Buellia muriformis (1)                 | AF540501.1                              | 93%        | 82.44%          |
|        |      |                                        | Calicium trabinellum (1)               | AY450579.1                              | 94%        | 82.21%          |
|        |      |                                        | Calicium pinicola (3)                  | MK811674.1, KX512917.1, KX512916.1      | 94%        | 81.78%          |
|        |      |                                        | Buellia halonia (1)                    | MN615680.1                              | 95%        | 81.69%          |
|        |      |                                        | Buellia papillata (1)                  | AF250790.1                              | 97%        | 81.57%          |
|        |      |                                        | Buellia spuria (1)                     | MN586930.1                              | 100%       | 81.30%          |
|        |      |                                        | Buellia penichra (1)                   | AF540503.1                              | 97%        | 80.88%          |
|        |      |                                        | Buellia arborea (1)                    | KX132975.1                              | 100%       | 80.35%          |
| XVII-a | 108A | Letharia / Psilolec Austrolecia sp.    | Letharia vulpina (19)                  | FJ161632.1, KU745854.1, KX132927.1, ... | 85%        | 85.71% - 86.38% |
|        |      |                                        | Letharia cf. columbiana (4)            | MG645049.1, MG645045.1, MG645047.1, ... | 85%        | 85.91% - 86.35% |
|        |      |                                        | Letharia cf. vulpina (3)               | MG645041.1, MG645035.1, MG645042.1      | 85%        | 85.91% - 86.35% |
|        |      |                                        | Letharia gracilis (2)                  | KJ565861.1, KJ565860.1                  | 85%        | 85.91% - 86.35% |
|        |      |                                        | Fungal sp. (4)                         | JN053159.1, JN053126.1, JN053165.1, ... | 85%        | 85.91% - 86.16% |
|        |      |                                        | Letharia aff. columbiana (8)           | KU745850.1, KU745811.1, MG645017.1, ... | 85%        | 85.91% - 86.16% |
|        |      |                                        | Letharia lupina (36)                   | FJ161472.1, MG645026.1, KU745844.1, ... | 85%        | 85.68% - 86.16% |
|        |      |                                        | Letharia sp. (1)                       | MW084670.1                              | 85%        | 86.16%          |
|        |      |                                        | Letharia aff. vulpina (5)              | MG645036.1, MG645034.1, MG645033.1, ... | 85%        | 86.16%          |
|        |      |                                        | Letharia columbiana (9)                | KU745835.1, KU745837.1, KJ565865.1, ... | 85%        | 85.91% - 86.13% |
|        |      |                                        | Letharia aff. columbiana 'barbata' (2) | MG645015.1, MG645014.1                  | 85%        | 86.13%          |
|        |      |                                        | Letharia aff. columbiana 'rugosa' (1)  | MG645030.1                              | 85%        | 85.94%          |
|        |      |                                        | Psilolechia clavulifera (2)            | MK811831.1, AY756495.1                  | 85%        | 85.52%          |
|        |      |                                        | Psilolechia lucida (1)                 | MK811768.1                              | 84%        | 85.33%          |
| XVII-a | 94A1 | Letharia / Psilolec Austrolecia sp.    | Letharia vulpina (19)                  | FJ161632.1, KU745854.1, KX132927.1, ... | 85%        | 85.71% - 86.38% |
|        |      |                                        | Letharia cf. columbiana (4)            | MG645049.1, MG645045.1, MG645047.1, ... | 85%        | 85.91% - 86.35% |
|        |      |                                        | Letharia cf. vulpina (3)               | MG645041.1, MG645035.1, MG645042.1      | 85%        | 85.91% - 86.35% |
|        |      |                                        | Letharia gracilis (2)                  | KJ565861.1, KJ565860.1                  | 85%        | 85.91% - 86.35% |
|        |      |                                        | Fungal sp. (4)                         | JN053159.1, JN053126.1, JN053165.1, ... | 85%        | 85.91% - 86.16% |
|        |      |                                        | Letharia aff. columbiana (8)           | KU745850.1, KU745811.1, MG645017.1, ... | 85%        | 85.91% - 86.16% |
|        |      |                                        | Letharia lupina (36)                   | FJ161472.1, MG645026.1, KU745844.1, ... | 85%        | 85.68% - 86.16% |
|        |      |                                        | Letharia aff. vulpina (5)              | MG645036.1, MG645034.1, MG645033.1, ... | 85%        | 86.16%          |
|        |      |                                        | Letharia sp. (1)                       | MW084670.1                              | 85%        | 86.16%          |
|        |      |                                        | Letharia columbiana (9)                | KU745835.1, KU745837.1, KJ565865.1, ... | 85%        | 85.91% - 86.13% |
|        |      |                                        | Letharia aff. columbiana 'barbata' (2) | MG645015.1, MG645014.1                  | 85%        | 86.13%          |
|        |      |                                        | Letharia aff. columbiana 'rugosa' (1)  | MG645030.1                              | 85%        | 85.94%          |
|        |      |                                        | Psilolechia clavulifera (2)            | MK811831.1, AY756495.1                  | 85%        | 85.52%          |
|        |      |                                        | Psilolechia lucida (1)                 | MK811768.1                              | 84%        | 85.33%          |
| XVII-b | 103A | Parmeliaceae / Ps. Austrolecia sp.     | Letharia vulpina (19)                  | FJ161632.1, MK811758.1, KJ565917.1, ... | 83% - 97%  | 83.40% - 86.38% |
|        |      |                                        | Letharia cf. vulpina (2)               | MG645041.1, MG645035.1                  | 83%        | 86.16% - 86.35% |
|        |      |                                        | Letharia cf. columbiana (4)            | MG645049.1, MG645045.1, MG645047.1, ... | 83%        | 85.91% - 86.35% |
|        |      |                                        | Letharia gracilis (4)                  | KJ565861.1, MW084669.1, EU543560.1, ... | 83% - 97%  | 83.37% - 86.35% |
|        |      |                                        | Fungal sp. (3)                         | JN053159.1, JN053126.1, JN053165.1      | 83%        | 86.13% - 86.16% |
|        |      |                                        | Letharia lupina (25)                   | FJ161472.1, MG645026.1, KU745839.1, ... | 83% - 95%  | 83.76% - 86.16% |
|        |      |                                        | Letharia aff. vulpina (5)              | MG645036.1, MG645034.1, MG645033.1, ... | 83%        | 86.16%          |

|        |      |                                   |                                        |                                         |           |                 |
|--------|------|-----------------------------------|----------------------------------------|-----------------------------------------|-----------|-----------------|
|        |      |                                   | Letharia columbiana (9)                | KU745837.1, KJ565865.1, KJ565853.1, ... | 83% - 97% | 83.76% - 86.13% |
|        |      |                                   | Letharia aff. columbiana (8)           | KU745850.1, KU745811.1, MG645017.1, ... | 83% - 96% | 83.56% - 86.13% |
|        |      |                                   | Letharia aff. columbiana 'barbata' (2) | MG645015.1, MG645014.1                  | 83%       | 86.13%          |
|        |      |                                   | Letharia aff. columbiana 'rugosa' (1)  | MG645030.1                              | 83%       | 85.94%          |
|        |      |                                   | Psilolechia clavulifera (2)            | MK811831.1, AY756495.1                  | 84%       | 85.52%          |
|        |      |                                   | Pleurosticta acetabulum (2)            | HQ650613.1, AF058034.1                  | 87%       | 85.01% - 85.41% |
|        |      |                                   | Usnea wasmuthii (2)                    | JN086334.1, JN086331.1                  | 87%       | 85.41%          |
|        |      |                                   | Usnea strigosa (2)                     | KC592273.1, MN038162.1                  | 88%       | 85.07% - 85.35% |
|        |      |                                   | Usnea sp. (2)                          | MT553305.1, MT553285.1                  | 87% - 88% | 85.19% - 85.32% |
|        |      |                                   | Usnea flammea (1)                      | JN086293.1                              | 88%       | 85.11%          |
|        |      |                                   | Usnea subcornuta (1)                   | JN086325.1                              | 90%       | 85.06%          |
|        |      |                                   | Letharia sp. (1)                       | MW084670.1                              | 97%       | 84.01%          |
|        |      |                                   | Psilolechia lucida (1)                 | MK811768.1                              | 95%       | 82.64%          |
|        |      |                                   | Psilolechia leprosa (1)                | JX171190.1                              | 97%       | 82.23%          |
|        |      |                                   | Menegazzia kawesqarica (1)             | KR995291.1                              | 96%       | 82.21%          |
| XVII-b | 107A | Parmeliaceae / P: Austrolecia sp. | Pleurosticta acetabulum (4)            | HQ650613.1, AY581087.1, MK812572.1, ... | 85%       | 89.36% - 89.87% |
|        |      |                                   | Usnea strigosa (1)                     | MH310890.1                              | 87%       | 89.82%          |
|        |      |                                   | Letharia cf. columbiana (6)            | MG645043.1, MG645052.1, MG645044.1, ... | 95% - 99% | 86.24% - 87.20% |
|        |      |                                   | Letharia columbiana (10)               | AF115762.2, KU745835.1, KJ565865.1, ... | 97% - 99% | 86.21% - 86.89% |
|        |      |                                   | Letharia vulpina (19)                  | FJ161632.1, KU745854.1, KX132927.1, ... | 99%       | 86.01% - 86.70% |
|        |      |                                   | Letharia cf. vulpina (3)               | MG645041.1, MG645035.1, MG645042.1      | 99%       | 86.21% - 86.67% |
|        |      |                                   | Letharia gracilis (2)                  | KJ565861.1, KJ565860.1                  | 99%       | 86.21% - 86.67% |
|        |      |                                   | Fungal sp. (4)                         | JN053159.1, JN053126.1, JN053165.1, ... | 99%       | 86.21% - 86.47% |
|        |      |                                   | Letharia aff. columbiana (8)           | KU745850.1, KU745811.1, MG645017.1, ... | 99%       | 86.21% - 86.47% |
|        |      |                                   | Letharia lupina (32)                   | FJ161472.1, MG645026.1, KU745844.1, ... | 99%       | 85.98% - 86.47% |
|        |      |                                   | Letharia sp. (1)                       | MW084670.1                              | 99%       | 86.47%          |
|        |      |                                   | Letharia aff. vulpina (5)              | MG645036.1, MG645034.1, MG645033.1, ... | 99%       | 86.47%          |
|        |      |                                   | Letharia aff. columbiana 'barbata' (2) | MG645015.1, MG645014.1                  | 99%       | 86.44%          |
|        |      |                                   | Letharia aff. columbiana 'rugosa'      | MG645030.1                              | 99%       | 86.24%          |
|        |      |                                   | Psilolechia clavulifera (2)            | MK811831.1, AY756495.1                  | 97%       | 86.21%          |
